# Supplementary material for: Transcriptome Profile Analysis of Intestinal Upper Villus Epithelial Cells and Crypt Epithelial Cells of Suckling Piglets
Source: MDPI journal article supplement (doi:10.3390/ani12182324), 2022-09-07
Supplement: s1 [file s1]

Table S3. KEGG Pathway classification of DEGs.

| Pathway ID | Pathway Name                           | Level 1                              | Level 2                             | Term Candidate Gene Num | Total Candidate Gene Num | Term Gene Num | Total Gene Num | Rich Ratio | P value   | Q value    |
|------------|----------------------------------------|--------------------------------------|-------------------------------------|-------------------------|--------------------------|---------------|----------------|------------|-----------|------------|
| ko04060    | Cytokine-cytokine receptor interaction | Environmental Information Processing | Signaling molecules and interaction | 44                      | 441                      | 325           | 11608          | 0.1353846  | 1.40E-13  | 3.99E-11   |
| ko00830    | Retinol metabolism                     | Metabolism                           | Metabolism of cofactors and         | 16                      | 441                      | 86            | 11608          | 0.1860465  | 1.20E-07  | 1.71E-05   |
| ko05204    | Chemical carcinogenesis                | Human Diseases                       | Cancers: Overview                   | 15                      | 441                      | 86            | 11608          | 0.1744186  | 7.15E-07  | 6.80E-05   |
| ko04975    | Fat digestion and absorption           | Organismal Systems                   | Digestive system                    | 11                      | 441                      | 53            | 11608          | 0.2075472  | 3.78E-06  | 0.00026946 |
| ko00140    | Steroid hormone biosynthesis           | Metabolism                           | Lipid metabolism                    | 12                      | 441                      | 72            | 11608          | 0.1666667  | 1.51E-05  | 0.00085929 |
| ko00590    | Arachidonic acid metabolism            | Metabolism                           | Lipid metabolism                    | 14                      | 441                      | 101           | 11608          | 0.1386139  | 2.65E-05  | 0.00094275 |
| ko05143    | African trypanosomiasis                | Human Diseases                       | Infectious diseases: Parasitic      | 10                      | 441                      | 53            | 11608          | 0.1886792  | 2.54E-05  | 0.00094275 |
| ko05323    | Rheumatoid arthritis                   | Human Diseases                       | Immune diseases                     | 16                      | 441                      | 125           | 11608          | 0.128      | 1.99E-05  | 0.00094275 |
| ko00591    | Linoleic acid metabolism               | Metabolism                           | Lipid metabolism                    | 9                       | 441                      | 44            | 11608          | 0.2045455  | 3.29E-05  | 0.00104325 |
| ko04672    | Intestinal immune network for IgA      | Organismal Systems                   | Immune system                       | 11                      | 441                      | 68            | 11608          | 0.1617647  | 4.55E-05  | 0.00108098 |
| ko05144    | Malaria                                | Human Diseases                       | Infectious diseases: Parasitic      | 12                      | 441                      | 80            | 11608          | 0.15       | 4.49E-05  | 0.00108098 |
| ko05340    | Primary immunodeficiency               | Human Diseases                       | Immune diseases                     | 10                      | 441                      | 56            | 11608          | 0.1785714  | 4.19E-05  | 0.00108098 |
| ko04062    | Chemokine signaling pathway            | Organismal Systems                   | Immune system                       | 22                      | 441                      | 254           | 11608          | 0.0866142  | 0.0002721 | 0.00553888 |
| ko04726    | Serotonergic synapse                   | Organismal Systems                   | Nervous system                      | 15                      | 441                      | 139           | 11608          | 0.1079137  | 0.0002544 | 0.00553888 |
| ko05321    | Inflammatory bowel disease (IBD)       | Human Diseases                       | Immune diseases                     | 11                      | 441                      | 87            | 11608          | 0.1264368  | 0.0004351 | 0.0082664  |
| ko04064    | NF-kappa B signaling pathway           | Environmental Information Processing | Signal transduction                 | 14                      | 441                      | 139           | 11608          | 0.1007194  | 0.000814  | 0.01449997 |

| Pathway ID | Pathway Name                                 | Level 1                              | Level 2                             | Term Candidate Gene Num | Total Candidate Gene Num | Term Gene Num | Total Gene Num | Rich Ratio | P value   | Q value    |
|------------|----------------------------------------------|--------------------------------------|-------------------------------------|-------------------------|--------------------------|---------------|----------------|------------|-----------|------------|
| ko05140    | Leishmaniasis                                | Human Diseases                       | Infectious diseases: Parasitic      | 11                      | 441                      | 95            | 11608          | 0.1157895  | 0.0009245 | 0.01549892 |
| ko03320    | PPAR signaling pathway                       | Organismal Systems                   | Endocrine system                    | 11                      | 441                      | 96            | 11608          | 0.1145833  | 0.0010093 | 0.01598096 |
| ko04610    | Complement and coagulation cascades          | Organismal Systems                   | Immune system                       | 13                      | 441                      | 131           | 11608          | 0.0992366  | 0.0014181 | 0.02127093 |
| ko04979    | Cholesterol metabolism                       | Organismal Systems                   | Digestive system                    | 9                       | 441                      | 75            | 11608          | 0.12       | 0.0020643 | 0.02941559 |
| ko04640    | Hematopoietic cell lineage                   | Organismal Systems                   | Immune system                       | 12                      | 441                      | 122           | 11608          | 0.0983607  | 0.0023031 | 0.03125647 |
| ko04657    | IL-17 signaling pathway                      | Organismal Systems                   | Immune system                       | 18                      | 441                      | 227           | 11608          | 0.0792952  | 0.0025806 | 0.03343113 |
| ko04614    | Renin-angiotensin system                     | Organismal Systems                   | Endocrine system                    | 5                       | 441                      | 28            | 11608          | 0.1785714  | 0.0036877 | 0.04569538 |
| ko04668    | TNF signaling pathway                        | Environmental Information Processing | Signal transduction                 | 12                      | 441                      | 137           | 11608          | 0.0875912  | 0.005931  | 0.07043038 |
| ko04512    | ECM-receptor interaction                     | Environmental Information Processing | Signaling molecules and interaction | 22                      | 441                      | 326           | 11608          | 0.0674847  | 0.0065855 | 0.07507504 |
| ko04151    | PI3K-Akt signaling pathway                   | Environmental Information Processing | Signal transduction                 | 37                      | 441                      | 641           | 11608          | 0.0577223  | 0.0071953 | 0.07887176 |
| ko04625    | C-type lectin receptor signaling pathway     | Organismal Systems                   | Immune system                       | 12                      | 441                      | 142           | 11608          | 0.084507   | 0.0078405 | 0.08276088 |
| ko04350    | TGF-beta signaling pathway                   | Environmental Information Processing | Signal transduction                 | 9                       | 441                      | 97            | 11608          | 0.0927835  | 0.011329  | 0.115313   |
| ko04371    | Apelin signaling pathway                     | Environmental Information Processing | Signal transduction                 | 14                      | 441                      | 188           | 11608          | 0.0744681  | 0.0125114 | 0.1229568  |
| ko05322    | Systemic lupus erythematosus                 | Human Diseases                       | Immune diseases                     | 12                      | 441                      | 152           | 11608          | 0.0789474  | 0.0130799 | 0.1242593  |
| ko04659    | Th17 cell differentiation                    | Organismal Systems                   | Immune system                       | 11                      | 441                      | 136           | 11608          | 0.0808824  | 0.0144895 | 0.1332096  |
| ko04977    | Vitamin digestion and absorption             | Organismal Systems                   | Digestive system                    | 5                       | 441                      | 39            | 11608          | 0.1282051  | 0.0153677 | 0.1368681  |
| ko04928    | Parathyroid hormone synthesis, secretion and | Organismal Systems                   | Endocrine system                    | 13                      | 441                      | 178           | 11608          | 0.0730337  | 0.0182473 | 0.1575906  |

| Pathway ID | Pathway Name                            | Level 1                              | Level 2                         | Term Candidate Gene Num | Total Candidate Gene Num | Term Gene Num | Total Gene Num | Rich Ratio | P value   | Q value   |
|------------|-----------------------------------------|--------------------------------------|---------------------------------|-------------------------|--------------------------|---------------|----------------|------------|-----------|-----------|
| ko04010    | MAPK signaling pathway                  | Environmental Information Processing | Signal transduction             | 22                      | 441                      | 361           | 11608          | 0.0609418  | 0.0197802 | 0.1610671 |
| ko04974    | Protein digestion and absorption        | Organismal Systems                   | Digestive system                | 37                      | 441                      | 686           | 11608          | 0.0539359  | 0.0194964 | 0.1610671 |
| ko04923    | Regulation of lipolysis in adipocytes   | Organismal Systems                   | Endocrine system                | 7                       | 441                      | 74            | 11608          | 0.0945946  | 0.0219818 | 0.1740224 |
| ko05146    | Amoebiasis                              | Human Diseases                       | Infectious diseases: Parasitic  | 30                      | 441                      | 547           | 11608          | 0.0548446  | 0.0275226 | 0.2119983 |
| ko04068    | FoxO signaling pathway                  | Environmental Information Processing | Signal transduction             | 11                      | 441                      | 153           | 11608          | 0.0718954  | 0.0315034 | 0.2244617 |
| ko04510    | Focal adhesion                          | Cellular Processes                   | Cellular community - eukaryotes | 27                      | 441                      | 487           | 11608          | 0.0554415  | 0.0314629 | 0.2244617 |
| ko05202    | Transcriptional misregulation in cancer | Human Diseases                       | Cancers: Overview               | 17                      | 441                      | 273           | 11608          | 0.0622711  | 0.0314661 | 0.2244617 |
| ko04360    | Axon guidance                           | Organismal Systems                   | Development                     | 16                      | 441                      | 255           | 11608          | 0.0627451  | 0.034089  | 0.2278475 |
| ko04913    | Ovarian steroidogenesis                 | Organismal Systems                   | Endocrine system                | 6                       | 441                      | 64            | 11608          | 0.09375    | 0.0341029 | 0.2278475 |
| ko05142    | Chagas disease (American                | Human Diseases                       | Infectious diseases: Parasitic  | 10                      | 441                      | 136           | 11608          | 0.0735294  | 0.034377  | 0.2278475 |
| ko05320    | Autoimmune thyroid disease              | Human Diseases                       | Immune diseases                 | 8                       | 441                      | 100           | 11608          | 0.08       | 0.0362755 | 0.2349662 |
| ko00430    | Taurine and hypotaurine metabolism      | Metabolism                           | Metabolism of other amino acids | 3                       | 441                      | 20            | 11608          | 0.15       | 0.0384089 | 0.2411847 |
| ko05132    | Salmonella infection                    | Human Diseases                       | Infectious diseases: Bacterial  | 12                      | 441                      | 178           | 11608          | 0.0674157  | 0.0389281 | 0.2411847 |
| ko05200    | Pathways in cancer                      | Human Diseases                       | Cancers: Overview               | 37                      | 441                      | 726           | 11608          | 0.0509642  | 0.0411471 | 0.2495089 |
| ko04620    | Toll-like receptor signaling pathway    | Organismal Systems                   | Immune system                   | 10                      | 441                      | 144           | 11608          | 0.0694444  | 0.0477332 | 0.2720791 |
| ko04742    | Taste transduction                      | Organismal Systems                   | Sensory system                  | 7                       | 441                      | 87            | 11608          | 0.0804598  | 0.0472071 | 0.2720791 |
| ko05414    | Dilated cardiomyopathy (DCM)            | Human Diseases                       | Cardiovascular diseases         | 10                      | 441                      | 144           | 11608          | 0.0694444  | 0.0477332 | 0.2720791 |

| Pathway ID | Pathway Name                           | Level 1                              | Level 2                         | Term Candidate Gene Num | Total Candidate Gene Num | Term Gene Num | Total Gene Num | Rich Ratio | P value   | Q value   |
|------------|----------------------------------------|--------------------------------------|---------------------------------|-------------------------|--------------------------|---------------|----------------|------------|-----------|-----------|
| ko05133    | Pertussis                              | Human Diseases                       | Infectious diseases: Bacterial  | 8                       | 441                      | 107           | 11608          | 0.0747664  | 0.0507421 | 0.2781055 |
| ko05410    | Hypertrophic cardiomyopathy (HCM)      | Human Diseases                       | Cardiovascular diseases         | 9                       | 441                      | 126           | 11608          | 0.0714286  | 0.0505662 | 0.2781055 |
| ko04380    | Osteoclast differentiation             | Organismal Systems                   | Development                     | 11                      | 441                      | 167           | 11608          | 0.0658683  | 0.0536099 | 0.2829413 |
| ko05210    | Colorectal cancer                      | Human Diseases                       | Cancers: Specific types         | 8                       | 441                      | 108           | 11608          | 0.0740741  | 0.0530735 | 0.2829413 |
| ko04978    | Mineral absorption                     | Organismal Systems                   | Digestive system                | 5                       | 441                      | 55            | 11608          | 0.0909091  | 0.057007  | 0.2954001 |
| ko04660    | T cell receptor signaling pathway      | Organismal Systems                   | Immune system                   | 9                       | 441                      | 130           | 11608          | 0.0692308  | 0.0593968 | 0.302287  |
| ko00500    | Starch and sucrose metabolism          | Metabolism                           | Carbohydrate metabolism         | 4                       | 441                      | 40            | 11608          | 0.1        | 0.0641109 | 0.3174274 |
| ko04216    | Ferroptosis                            | Cellular Processes                   | Cell growth and death           | 5                       | 441                      | 57            | 11608          | 0.0877193  | 0.0645993 | 0.3174274 |
| ko05020    | Prion diseases                         | Human Diseases                       | Neurodegenerative diseases      | 5                       | 441                      | 58            | 11608          | 0.0862069  | 0.0685978 | 0.3285178 |
| ko05145    | Toxoplasmosis                          | Human Diseases                       | Infectious diseases: Parasitic  | 9                       | 441                      | 134           | 11608          | 0.0671642  | 0.0691617 | 0.3285178 |
| ko04390    | Hippo signaling pathway                | Environmental Information Processing | Signal transduction             | 12                      | 441                      | 197           | 11608          | 0.0609137  | 0.0726522 | 0.3394406 |
| ko04662    | B cell receptor signaling pathway      | Organismal Systems                   | Immune system                   | 7                       | 441                      | 97            | 11608          | 0.0721649  | 0.0757419 | 0.3426418 |
| ko05418    | Fluid shear stress and atherosclerosis | Human Diseases                       | Cardiovascular diseases         | 12                      | 441                      | 198           | 11608          | 0.0606061  | 0.074827  | 0.3426418 |
| ko04926    | Relaxin signaling pathway              | Organismal Systems                   | Endocrine system                | 21                      | 441                      | 396           | 11608          | 0.0530303  | 0.0771949 | 0.3437585 |
| ko02010    | ABC transporters                       | Environmental Information Processing | Membrane transport              | 6                       | 441                      | 81            | 11608          | 0.0740741  | 0.0872257 | 0.3824513 |
| ko05134    | Legionellosis                          | Human Diseases                       | Infectious diseases: Bacterial  | 7                       | 441                      | 103           | 11608          | 0.0679612  | 0.0968366 | 0.4181579 |
| ko00480    | Glutathione metabolism                 | Metabolism                           | Metabolism of other amino acids | 5                       | 441                      | 65            | 11608          | 0.0769231  | 0.1002799 | 0.4265638 |

| Pathway ID | Pathway Name                                     | Level 1                              | Level 2                             | Term Candidate Gene Num | Total Candidate Gene Num | Term Gene Num | Total Gene Num | Rich Ratio | P value   | Q value   |
|------------|--------------------------------------------------|--------------------------------------|-------------------------------------|-------------------------|--------------------------|---------------|----------------|------------|-----------|-----------|
| ko04950    | Maturity onset diabetes of the young             | Human Diseases                       | Endocrine and metabolic diseases    | 3                       | 441                      | 30            | 11608          | 0.1        | 0.1039461 | 0.4350046 |
| ko05330    | Allograft rejection                              | Human Diseases                       | Immune diseases                     | 5                       | 441                      | 66            | 11608          | 0.0757576  | 0.1053169 | 0.4350046 |
| ko04514    | Cell adhesion molecules (CAMs)                   | Environmental Information Processing | Signaling molecules and interaction | 11                      | 441                      | 191           | 11608          | 0.0575916  | 0.1117053 | 0.4504148 |
| ko05167    | Kaposi's sarcoma-associated herpesvirus          | Human Diseases                       | Infectious diseases: Viral          | 14                      | 441                      | 257           | 11608          | 0.0544747  | 0.1122086 | 0.4504148 |
| ko00760    | Nicotinate and nicotinamide metabolism           | Metabolism                           | Metabolism of cofactors and         | 4                       | 441                      | 49            | 11608          | 0.0816327  | 0.1146499 | 0.4538225 |
| ko05211    | Renal cell carcinoma                             | Human Diseases                       | Cancers: Specific types             | 6                       | 441                      | 88            | 11608          | 0.0681818  | 0.1176097 | 0.4591612 |
| ko04973    | Carbohydrate digestion and absorption            | Organismal Systems                   | Digestive system                    | 4                       | 441                      | 51            | 11608          | 0.0784314  | 0.1277158 | 0.48532   |
| ko05310    | Asthma                                           | Human Diseases                       | Immune diseases                     | 4                       | 441                      | 51            | 11608          | 0.0784314  | 0.1277158 | 0.48532   |
| ko04713    | Circadian entrainment                            | Organismal Systems                   | Environmental adaptation            | 8                       | 441                      | 133           | 11608          | 0.0601504  | 0.1336731 | 0.4884209 |
| ko04933    | AGE-RAGE signaling pathway in diabetic           | Human Diseases                       | Endocrine and metabolic diseases    | 18                      | 441                      | 355           | 11608          | 0.0507042  | 0.130502  | 0.4884209 |
| ko05222    | Small cell lung cancer                           | Human Diseases                       | Cancers: Specific types             | 10                      | 441                      | 176           | 11608          | 0.0568182  | 0.1333889 | 0.4884209 |
| ko04976    | Bile secretion                                   | Organismal Systems                   | Digestive system                    | 7                       | 441                      | 115           | 11608          | 0.0608696  | 0.1476146 | 0.5325337 |
| ko05206    | MicroRNAs in cancer                              | Human Diseases                       | Cancers: Overview                   | 11                      | 441                      | 203           | 11608          | 0.0541872  | 0.150623  | 0.5365944 |
| ko05120    | Epithelial cell signaling in Helicobacter pylori | Human Diseases                       | Infectious diseases: Bacterial      | 5                       | 441                      | 75            | 11608          | 0.0666667  | 0.1558782 | 0.5484603 |
| ko04921    | Oxytocin signaling pathway                       | Organismal Systems                   | Endocrine system                    | 11                      | 441                      | 206           | 11608          | 0.0533981  | 0.1613281 | 0.5607135 |
| ko04630    | Jak-STAT signaling pathway                       | Environmental Information Processing | Signal transduction                 | 11                      | 441                      | 208           | 11608          | 0.0528846  | 0.1686711 | 0.5791718 |
| ko00561    | Glycerolipid metabolism                          | Metabolism                           | Lipid metabolism                    | 5                       | 441                      | 79            | 11608          | 0.0632911  | 0.1810499 | 0.6070497 |

| Pathway ID | Pathway Name                             | Level 1                              | Level 2                         | Term Candidate Gene Num | Total Candidate Gene Num | Term Gene Num | Total Gene Num | Rich Ratio | P value   | Q value   |
|------------|------------------------------------------|--------------------------------------|---------------------------------|-------------------------|--------------------------|---------------|----------------|------------|-----------|-----------|
| ko05220    | Chronic myeloid leukemia                 | Human Diseases                       | Cancers: Specific types         | 6                       | 441                      | 100           | 11608          | 0.06       | 0.1800306 | 0.6070497 |
| ko05152    | Tuberculosis                             | Human Diseases                       | Infectious diseases: Bacterial  | 14                      | 441                      | 282           | 11608          | 0.0496454  | 0.1864576 | 0.6179118 |
| ko00220    | Arginine biosynthesis                    | Metabolism                           | Amino acid metabolism           | 2                       | 441                      | 21            | 11608          | 0.0952381  | 0.1888648 | 0.618695  |
| ko00790    | Folate biosynthesis                      | Metabolism                           | Metabolism of cofactors and     | 3                       | 441                      | 40            | 11608          | 0.075      | 0.1934572 | 0.6265375 |
| ko05205    | Proteoglycans in cancer                  | Human Diseases                       | Cancers: Overview               | 13                      | 441                      | 262           | 11608          | 0.0496183  | 0.1980511 | 0.6271618 |
| ko00770    | Pantothenate and CoA biosynthesis        | Metabolism                           | Metabolism of cofactors and     | 2                       | 441                      | 22            | 11608          | 0.0909091  | 0.2028424 | 0.630885  |
| ko04024    | cAMP signaling pathway                   | Environmental Information Processing | Signal transduction             | 14                      | 441                      | 287           | 11608          | 0.0487805  | 0.2036541 | 0.630885  |
| ko05030    | Cocaine addiction                        | Human Diseases                       | Substance dependence            | 4                       | 441                      | 62            | 11608          | 0.0645161  | 0.2090004 | 0.6404851 |
| ko03020    | RNA polymerase                           | Genetic Information Processing       | Transcription                   | 6                       | 441                      | 107           | 11608          | 0.0560748  | 0.2214677 | 0.6584302 |
| ko04270    | Vascular smooth muscle contraction       | Organismal Systems                   | Circulatory system              | 9                       | 441                      | 175           | 11608          | 0.0514286  | 0.221787  | 0.6584302 |
| ko04621    | NOD-like receptor signaling pathway      | Organismal Systems                   | Immune system                   | 12                      | 441                      | 244           | 11608          | 0.0491803  | 0.2184957 | 0.6584302 |
| ko05166    | HTLV-I infection                         | Human Diseases                       | Infectious diseases: Viral      | 15                      | 441                      | 318           | 11608          | 0.0471698  | 0.2293862 | 0.6739698 |
| ko04215    | Apoptosis - multiple species             | Cellular Processes                   | Cell growth and death           | 3                       | 441                      | 44            | 11608          | 0.0681818  | 0.2333894 | 0.6787345 |
| ko00260    | Glycine, serine and threonine metabolism | Metabolism                           | Amino acid metabolism           | 3                       | 441                      | 45            | 11608          | 0.0666667  | 0.2436001 | 0.6942603 |
| ko00860    | Porphyrin and chlorophyll metabolism     | Metabolism                           | Metabolism of cofactors and     | 3                       | 441                      | 45            | 11608          | 0.0666667  | 0.2436001 | 0.6942603 |
| ko01523    | Antifolate resistance                    | Human Diseases                       | Drug resistance: Antineoplastic | 4                       | 441                      | 67            | 11608          | 0.0597015  | 0.2499103 | 0.7051924 |
| ko00360    | Phenylalanine metabolism                 | Metabolism                           | Amino acid metabolism           | 2                       | 441                      | 26            | 11608          | 0.0769231  | 0.2595852 | 0.7253116 |

| Pathway ID | Pathway Name                             | Level 1                              | Level 2                        | Term Candidate Gene Num | Total Candidate Gene Num | Term Gene Num | Total Gene Num | Rich Ratio | P value   | Q value   |
|------------|------------------------------------------|--------------------------------------|--------------------------------|-------------------------|--------------------------|---------------|----------------|------------|-----------|-----------|
| ko04920    | Adipocytokine signaling pathway          | Organismal Systems                   | Endocrine system               | 5                       | 441                      | 91            | 11608          | 0.0549451  | 0.2640417 | 0.7306008 |
| ko04310    | Wnt signaling pathway                    | Environmental Information Processing | Signal transduction            | 9                       | 441                      | 185           | 11608          | 0.0486486  | 0.2710244 | 0.7427111 |
| ko05219    | Bladder cancer                           | Human Diseases                       | Cancers: Specific types        | 3                       | 441                      | 48            | 11608          | 0.0625     | 0.2746135 | 0.7453795 |
| ko05169    | Epstein-Barr virus infection             | Human Diseases                       | Infectious diseases: Viral     | 14                      | 441                      | 307           | 11608          | 0.0456026  | 0.278862  | 0.7497705 |
| ko00400    | Phenylalanine, tyrosine and tryptophan   | Metabolism                           | Amino acid metabolism          | 1                       | 441                      | 9             | 11608          | 0.1111111  | 0.2943996 | 0.7841485 |
| ko04964    | Proximal tubule bicarbonate reclamation  | Organismal Systems                   | Excretory system               | 2                       | 441                      | 29            | 11608          | 0.0689655  | 0.3023241 | 0.7899574 |
| ko05033    | Nicotine addiction                       | Human Diseases                       | Substance dependence           | 3                       | 441                      | 51            | 11608          | 0.0588235  | 0.3059973 | 0.7899574 |
| ko05100    | Bacterial invasion of epithelial cells   | Human Diseases                       | Infectious diseases: Bacterial | 8                       | 441                      | 168           | 11608          | 0.047619   | 0.3076676 | 0.7899574 |
| ko05217    | Basal cell carcinoma                     | Human Diseases                       | Cancers: Specific types        | 4                       | 441                      | 73            | 11608          | 0.0547945  | 0.3009346 | 0.7899574 |
| ko05224    | Breast cancer                            | Human Diseases                       | Cancers: Specific types        | 9                       | 441                      | 193           | 11608          | 0.0466321  | 0.3125335 | 0.7952861 |
| ko05150    | Staphylococcus aureus infection          | Human Diseases                       | Infectious diseases: Bacterial | 4                       | 441                      | 75            | 11608          | 0.0533333  | 0.318228  | 0.8026104 |
| ko00740    | Riboflavin metabolism                    | Metabolism                           | Metabolism of cofactors and    | 1                       | 441                      | 10            | 11608          | 0.1        | 0.3212269 | 0.8030673 |
| ko00040    | Pentose and glucuronate interconversions | Metabolism                           | Carbohydrate metabolism        | 2                       | 441                      | 31            | 11608          | 0.0645161  | 0.3305966 | 0.8037422 |
| ko04623    | Cytosolic DNA-sensing pathway            | Organismal Systems                   | Immune system                  | 5                       | 441                      | 100           | 11608          | 0.05       | 0.330987  | 0.8037422 |
| ko05162    | Measles                                  | Human Diseases                       | Infectious diseases: Viral     | 9                       | 441                      | 197           | 11608          | 0.0456853  | 0.3337997 | 0.8037422 |
| ko05213    | Endometrial cancer                       | Human Diseases                       | Cancers: Specific types        | 4                       | 441                      | 77            | 11608          | 0.0519481  | 0.3355976 | 0.8037422 |
| ko05412    | Arrhythmogenic right ventricular         | Human Diseases                       | Cardiovascular diseases        | 5                       | 441                      | 100           | 11608          | 0.05       | 0.330987  | 0.8037422 |

| Pathway ID | Pathway Name                               | Level 1                              | Level 2                            | Term Candidate Gene Num | Total Candidate Gene Num | Term Gene Num | Total Gene Num | Rich Ratio | P value   | Q value   |
|------------|--------------------------------------------|--------------------------------------|------------------------------------|-------------------------|--------------------------|---------------|----------------|------------|-----------|-----------|
| ko00650    | Butanoate metabolism                       | Metabolism                           | Carbohydrate metabolism            | 2                       | 441                      | 33            | 11608          | 0.0606061  | 0.3585404 | 0.8463374 |
| ko04725    | Cholinergic synapse                        | Organismal Systems                   | Nervous system                     | 6                       | 441                      | 128           | 11608          | 0.046875   | 0.3593222 | 0.8463374 |
| ko00230    | Purine metabolism                          | Metabolism                           | Nucleotide metabolism              | 12                      | 441                      | 279           | 11608          | 0.0430108  | 0.3714439 | 0.8677173 |
| ko04924    | Renin secretion                            | Organismal Systems                   | Endocrine system                   | 5                       | 441                      | 106           | 11608          | 0.0471698  | 0.3765154 | 0.8724137 |
| ko00601    | Glycosphingolipid biosynthesis - lacto and | Metabolism                           | Glycan biosynthesis and metabolism | 2                       | 441                      | 37            | 11608          | 0.0540541  | 0.4130276 | 0.9300616 |
| ko04650    | Natural killer cell mediated cytotoxicity  | Organismal Systems                   | Immune system                      | 7                       | 441                      | 161           | 11608          | 0.0434783  | 0.4128457 | 0.9300616 |
| ko05032    | Morphine addiction                         | Human Diseases                       | Substance dependence               | 5                       | 441                      | 111           | 11608          | 0.045045   | 0.4144485 | 0.9300616 |
| ko05416    | Viral myocarditis                          | Human Diseases                       | Cardiovascular diseases            | 5                       | 441                      | 111           | 11608          | 0.045045   | 0.4144485 | 0.9300616 |
| ko04972    | Pancreatic secretion                       | Organismal Systems                   | Digestive system                   | 6                       | 441                      | 137           | 11608          | 0.0437956  | 0.4207749 | 0.9345437 |
| ko05161    | Hepatitis B                                | Human Diseases                       | Infectious diseases: Viral         | 8                       | 441                      | 188           | 11608          | 0.0425532  | 0.423004  | 0.9345437 |
| ko00072    | Synthesis and degradation of ketone        | Metabolism                           | Lipid metabolism                   | 1                       | 441                      | 15            | 11608          | 0.0666667  | 0.4408459 | 0.93762   |
| ko04066    | HIF-1 signaling pathway                    | Environmental Information Processing | Signal transduction                | 5                       | 441                      | 114           | 11608          | 0.0438596  | 0.437052  | 0.93762   |
| ko04122    | Sulfur relay system                        | Genetic Information Processing       | Folding, sorting and degradation   | 1                       | 441                      | 15            | 11608          | 0.0666667  | 0.4408459 | 0.93762   |
| ko05212    | Pancreatic cancer                          | Human Diseases                       | Cancers: Specific types            | 4                       | 441                      | 88            | 11608          | 0.0454545  | 0.4308994 | 0.93762   |
| ko05226    | Gastric cancer                             | Human Diseases                       | Cancers: Specific types            | 15                      | 441                      | 370           | 11608          | 0.0405405  | 0.4356996 | 0.93762   |
| ko04724    | Glutamatergic synapse                      | Organismal Systems                   | Nervous system                     | 6                       | 441                      | 141           | 11608          | 0.0425532  | 0.4479116 | 0.9455912 |
| ko00061    | Fatty acid biosynthesis                    | Metabolism                           | Lipid metabolism                   | 1                       | 441                      | 16            | 11608          | 0.0625     | 0.4621163 | 0.9468596 |

| Pathway ID | Pathway Name                                | Level 1                              | Level 2                     | Term Candidate Gene Num | Total Candidate Gene Num | Term Gene Num | Total Gene Num | Rich Ratio | P value   | Q value   |
|------------|---------------------------------------------|--------------------------------------|-----------------------------|-------------------------|--------------------------|---------------|----------------|------------|-----------|-----------|
| ko00250    | Alanine, aspartate and glutamate metabolism | Metabolism                           | Amino acid metabolism       | 2                       | 441                      | 41            | 11608          | 0.0487805  | 0.465124  | 0.9468596 |
| ko04020    | Calcium signaling pathway                   | Environmental Information Processing | Signal transduction         | 11                      | 441                      | 272           | 11608          | 0.0404412  | 0.4598547 | 0.9468596 |
| ko04115    | p53 signaling pathway                       | Cellular Processes                   | Cell growth and death       | 5                       | 441                      | 117           | 11608          | 0.042735   | 0.4594565 | 0.9468596 |
| ko05163    | Human cytomegalovirus infection             | Human Diseases                       | Infectious diseases: Viral  | 13                      | 441                      | 325           | 11608          | 0.04       | 0.4649296 | 0.9468596 |
| ko00052    | Galactose metabolism                        | Metabolism                           | Carbohydrate metabolism     | 2                       | 441                      | 42            | 11608          | 0.047619   | 0.4777193 | 0.9588028 |
| ko04392    | Hippo signaling pathway - multiple species  | Environmental Information Processing | Signal transduction         | 2                       | 441                      | 42            | 11608          | 0.047619   | 0.4777193 | 0.9588028 |
| ko00730    | Thiamine metabolism                         | Metabolism                           | Metabolism of cofactors and | 1                       | 441                      | 18            | 11608          | 0.0555556  | 0.5022654 | 0.994742  |
| ko05031    | Amphetamine addiction                       | Human Diseases                       | Substance dependence        | 4                       | 441                      | 97            | 11608          | 0.0412371  | 0.5060968 | 0.994742  |
| ko05165    | Human papillomavirus infection              | Human Diseases                       | Infectious diseases: Viral  | 25                      | 441                      | 650           | 11608          | 0.0384615  | 0.5047784 | 0.994742  |
| ko00010    | Glycolysis / Gluconeogenesis                | Metabolism                           | Carbohydrate metabolism     | 3                       | 441                      | 102           | 11608          | 0.0294118  | 0.7499366 | 1         |
| ko00020    | Citrate cycle (TCA cycle)                   | Metabolism                           | Carbohydrate metabolism     | 1                       | 441                      | 51            | 11608          | 0.0196078  | 0.8618835 | 1         |
| ko00051    | Fructose and mannose metabolism             | Metabolism                           | Carbohydrate metabolism     | 1                       | 441                      | 36            | 11608          | 0.0277778  | 0.7525341 | 1         |
| ko00053    | Ascorbate and aldarate metabolism           | Metabolism                           | Carbohydrate metabolism     | 1                       | 441                      | 26            | 11608          | 0.0384615  | 0.6350981 | 1         |
| ko00071    | Fatty acid degradation                      | Metabolism                           | Lipid metabolism            | 2                       | 441                      | 57            | 11608          | 0.0350877  | 0.6432413 | 1         |
| ko00100    | Steroid biosynthesis                        | Metabolism                           | Lipid metabolism            | 1                       | 441                      | 29            | 11608          | 0.0344828  | 0.6752168 | 1         |
| ko00120    | Primary bile acid biosynthesis              | Metabolism                           | Lipid metabolism            | 1                       | 441                      | 20            | 11608          | 0.05       | 0.539424  | 1         |
| ko00240    | Pyrimidine metabolism                       | Metabolism                           | Nucleotide metabolism       | 7                       | 441                      | 189           | 11608          | 0.037037   | 0.581503  | 1         |

| Pathway ID | Pathway Name                                 | Level 1    | Level 2                            | Term Candidate Gene Num | Total Candidate Gene Num | Term Gene Num | Total Gene Num | Rich Ratio | P value   | Q value |
|------------|----------------------------------------------|------------|------------------------------------|-------------------------|--------------------------|---------------|----------------|------------|-----------|---------|
| ko00270    | Cysteine and methionine metabolism           | Metabolism | Amino acid metabolism              | 2                       | 441                      | 57            | 11608          | 0.0350877  | 0.6432413 | 1       |
| ko00280    | Valine, leucine and isoleucine degradation   | Metabolism | Amino acid metabolism              | 2                       | 441                      | 70            | 11608          | 0.0285714  | 0.7507536 | 1       |
| ko00310    | Lysine degradation                           | Metabolism | Amino acid metabolism              | 2                       | 441                      | 132           | 11608          | 0.0151515  | 0.9633254 | 1       |
| ko00330    | Arginine and proline metabolism              | Metabolism | Amino acid metabolism              | 2                       | 441                      | 70            | 11608          | 0.0285714  | 0.7507536 | 1       |
| ko00350    | Tyrosine metabolism                          | Metabolism | Amino acid metabolism              | 2                       | 441                      | 53            | 11608          | 0.0377358  | 0.6035308 | 1       |
| ko00380    | Tryptophan metabolism                        | Metabolism | Amino acid metabolism              | 2                       | 441                      | 59            | 11608          | 0.0338983  | 0.6618902 | 1       |
| ko00410    | beta-Alanine metabolism                      | Metabolism | Metabolism of other amino acids    | 1                       | 441                      | 37            | 11608          | 0.027027   | 0.7619648 | 1       |
| ko00511    | Other glycan degradation                     | Metabolism | Glycan biosynthesis and metabolism | 1                       | 441                      | 26            | 11608          | 0.0384615  | 0.6350981 | 1       |
| ko00512    | Mucin type O-glycan biosynthesis             | Metabolism | Glycan biosynthesis and metabolism | 1                       | 441                      | 35            | 11608          | 0.0285714  | 0.7427306 | 1       |
| ko00531    | Glycosaminoglycan degradation                | Metabolism | Glycan biosynthesis and metabolism | 1                       | 441                      | 24            | 11608          | 0.0416667  | 0.6056422 | 1       |
| ko00532    | Glycosaminoglycan biosynthesis - chondroitin | Metabolism | Glycan biosynthesis and metabolism | 1                       | 441                      | 23            | 11608          | 0.0434783  | 0.5900363 | 1       |
| ko00564    | Glycerophospholipid metabolism               | Metabolism | Lipid metabolism                   | 4                       | 441                      | 135           | 11608          | 0.0296296  | 0.7597137 | 1       |
| ko00565    | Ether lipid metabolism                       | Metabolism | Lipid metabolism                   | 2                       | 441                      | 65            | 11608          | 0.0307692  | 0.7131525 | 1       |
| ko00592    | alpha-Linolenic acid metabolism              | Metabolism | Lipid metabolism                   | 1                       | 441                      | 32            | 11608          | 0.03125    | 0.7109337 | 1       |
| ko00600    | Sphingolipid metabolism                      | Metabolism | Lipid metabolism                   | 2                       | 441                      | 64            | 11608          | 0.03125    | 0.7050855 | 1       |
| ko00603    | Glycosphingolipid biosynthesis - globo and   | Metabolism | Glycan biosynthesis and metabolism | 1                       | 441                      | 19            | 11608          | 0.0526316  | 0.5212042 | 1       |
| ko00604    | Glycosphingolipid biosynthesis - ganglio     | Metabolism | Glycan biosynthesis and metabolism | 1                       | 441                      | 22            | 11608          | 0.0454545  | 0.5738143 | 1       |

| Pathway ID | Pathway Name                              | Level 1                        | Level 2                          | Term Candidate Gene Num | Total Candidate Gene Num | Term Gene Num | Total Gene Num | Rich Ratio | P value   | Q value |
|------------|-------------------------------------------|--------------------------------|----------------------------------|-------------------------|--------------------------|---------------|----------------|------------|-----------|---------|
| ko00620    | Pyruvate metabolism                       | Metabolism                     | Carbohydrate metabolism          | 3                       | 441                      | 88            | 11608          | 0.0340909  | 0.655311  | 1       |
| ko00640    | Propanoate metabolism                     | Metabolism                     | Carbohydrate metabolism          | 1                       | 441                      | 66            | 11608          | 0.0151515  | 0.9229735 | 1       |
| ko00980    | Metabolism of xenobiotics by              | Metabolism                     | Xenobiotics biodegradation and   | 2                       | 441                      | 66            | 11608          | 0.030303   | 0.7210339 | 1       |
| ko00982    | Drug metabolism - cytochrome P450         | Metabolism                     | Xenobiotics biodegradation and   | 2                       | 441                      | 63            | 11608          | 0.031746   | 0.6968307 | 1       |
| ko00983    | Drug metabolism - other enzymes           | Metabolism                     | Xenobiotics biodegradation and   | 2                       | 441                      | 78            | 11608          | 0.025641   | 0.8020848 | 1       |
| ko01212    | Fatty acid metabolism                     | Metabolism                     | Global and overview maps         | 2                       | 441                      | 60            | 11608          | 0.0333333  | 0.6709174 | 1       |
| ko01230    | Biosynthesis of amino acids               | Metabolism                     | Global and overview maps         | 1                       | 441                      | 90            | 11608          | 0.0111111  | 0.9697885 | 1       |
| ko01521    | EGFR tyrosine kinase inhibitor resistance | Human Diseases                 | Drug resistance: Antineoplastic  | 2                       | 441                      | 99            | 11608          | 0.020202   | 0.8948947 | 1       |
| ko01522    | Endocrine resistance                      | Human Diseases                 | Drug resistance: Antineoplastic  | 5                       | 441                      | 144           | 11608          | 0.0347222  | 0.6438103 | 1       |
| ko01524    | Platinum drug resistance                  | Human Diseases                 | Drug resistance: Antineoplastic  | 3                       | 441                      | 91            | 11608          | 0.032967   | 0.6775436 | 1       |
| ko03008    | Ribosome biogenesis in eukaryotes         | Genetic Information Processing | Translation                      | 1                       | 441                      | 106           | 11608          | 0.009434   | 0.9838299 | 1       |
| ko03010    | Ribosome                                  | Genetic Information Processing | Translation                      | 2                       | 441                      | 191           | 11608          | 0.0104712  | 0.9950078 | 1       |
| ko03013    | RNA transport                             | Genetic Information Processing | Translation                      | 6                       | 441                      | 279           | 11608          | 0.0215054  | 0.9572116 | 1       |
| ko03015    | mRNA surveillance pathway                 | Genetic Information Processing | Translation                      | 7                       | 441                      | 189           | 11608          | 0.037037   | 0.581503  | 1       |
| ko03018    | RNA degradation                           | Genetic Information Processing | Folding, sorting and degradation | 2                       | 441                      | 101           | 11608          | 0.019802   | 0.9012147 | 1       |
| ko03022    | Basal transcription factors               | Genetic Information Processing | Transcription                    | 2                       | 441                      | 147           | 11608          | 0.0136054  | 0.9776611 | 1       |
| ko03040    | Spliceosome                               | Genetic Information Processing | Transcription                    | 1                       | 441                      | 188           | 11608          | 0.0053191  | 0.9993522 | 1       |

| Pathway ID | Pathway Name                                | Level 1                              | Level 2                             | Term Candidate Gene Num | Total Candidate Gene Num | Term Gene Num | Total Gene Num | Rich Ratio | P value   | Q value |
|------------|---------------------------------------------|--------------------------------------|-------------------------------------|-------------------------|--------------------------|---------------|----------------|------------|-----------|---------|
| ko03410    | Base excision repair                        | Genetic Information Processing       | Replication and repair              | 1                       | 441                      | 48            | 11608          | 0.0208333  | 0.8447876 | 1       |
| ko03440    | Homologous recombination                    | Genetic Information Processing       | Replication and repair              | 1                       | 441                      | 48            | 11608          | 0.0208333  | 0.8447876 | 1       |
| ko04012    | ErbB signaling pathway                      | Environmental Information Processing | Signal transduction                 | 3                       | 441                      | 100           | 11608          | 0.03       | 0.7378222 | 1       |
| ko04013    | MAPK signaling pathway - fly                | Environmental Information Processing | Signal transduction                 | 5                       | 441                      | 129           | 11608          | 0.0387597  | 0.5459442 | 1       |
| ko04014    | Ras signaling pathway                       | Environmental Information Processing | Signal transduction                 | 11                      | 441                      | 330           | 11608          | 0.0333333  | 0.7146007 | 1       |
| ko04015    | Rap1 signaling pathway                      | Environmental Information Processing | Signal transduction                 | 10                      | 441                      | 315           | 11608          | 0.031746   | 0.7633742 | 1       |
| ko04022    | cGMP-PKG signaling pathway                  | Environmental Information Processing | Signal transduction                 | 6                       | 441                      | 229           | 11608          | 0.0262009  | 0.8722601 | 1       |
| ko04071    | Sphingolipid signaling pathway              | Environmental Information Processing | Signal transduction                 | 2                       | 441                      | 149           | 11608          | 0.0134228  | 0.9791039 | 1       |
| ko04072    | Phospholipase D signaling pathway           | Environmental Information Processing | Signal transduction                 | 6                       | 441                      | 194           | 11608          | 0.0309278  | 0.7515674 | 1       |
| ko04080    | Neuroactive ligand-receptor interaction     | Environmental Information Processing | Signaling molecules and interaction | 10                      | 441                      | 326           | 11608          | 0.0306748  | 0.7985889 | 1       |
| ko04110    | Cell cycle                                  | Cellular Processes                   | Cell growth and death               | 4                       | 441                      | 153           | 11608          | 0.0261438  | 0.838374  | 1       |
| ko04114    | Oocyte meiosis                              | Cellular Processes                   | Cell growth and death               | 1                       | 441                      | 162           | 11608          | 0.0061728  | 0.9981988 | 1       |
| ko04130    | SNARE interactions in vesicular transport   | Genetic Information Processing       | Folding, sorting and degradation    | 1                       | 441                      | 38            | 11608          | 0.0263158  | 0.7710369 | 1       |
| ko04136    | Autophagy - other                           | Cellular Processes                   | Transport and catabolism            | 1                       | 441                      | 40            | 11608          | 0.025      | 0.7881592 | 1       |
| ko04137    | Mitophagy - animal                          | Cellular Processes                   | Transport and catabolism            | 3                       | 441                      | 76            | 11608          | 0.0394737  | 0.5557538 | 1       |
| ko04140    | Autophagy - animal                          | Cellular Processes                   | Transport and catabolism            | 5                       | 441                      | 164           | 11608          | 0.0304878  | 0.7518975 | 1       |
| ko04141    | Protein processing in endoplasmic reticulum | Genetic Information Processing       | Folding, sorting and degradation    | 7                       | 441                      | 213           | 11608          | 0.0328638  | 0.7048863 | 1       |

| Pathway ID | Pathway Name                            | Level 1                              | Level 2                  | Term Candidate Gene Num | Total Candidate Gene Num | Term Gene Num | Total Gene Num | Rich Ratio | P value   | Q value |
|------------|-----------------------------------------|--------------------------------------|--------------------------|-------------------------|--------------------------|---------------|----------------|------------|-----------|---------|
| ko04144    | Endocytosis                             | Cellular Processes                   | Transport and catabolism | 12                      | 441                      | 451           | 11608          | 0.0266075  | 0.9279206 | 1       |
| ko04145    | Phagosome                               | Cellular Processes                   | Transport and catabolism | 5                       | 441                      | 204           | 11608          | 0.0245098  | 0.8919017 | 1       |
| ko04146    | Peroxisome                              | Cellular Processes                   | Transport and catabolism | 2                       | 441                      | 110           | 11608          | 0.0181818  | 0.9255055 | 1       |
| ko04150    | mTOR signaling pathway                  | Environmental Information Processing | Signal transduction      | 2                       | 441                      | 187           | 11608          | 0.0106952  | 0.9942662 | 1       |
| ko04152    | AMPK signaling pathway                  | Environmental Information Processing | Signal transduction      | 5                       | 441                      | 153           | 11608          | 0.0326797  | 0.6957749 | 1       |
| ko04210    | Apoptosis                               | Cellular Processes                   | Cell growth and death    | 7                       | 441                      | 189           | 11608          | 0.037037   | 0.581503  | 1       |
| ko04211    | Longevity regulating pathway            | Organismal Systems                   | Aging                    | 2                       | 441                      | 114           | 11608          | 0.0175439  | 0.9343888 | 1       |
| ko04212    | Longevity regulating pathway - worm     | Organismal Systems                   | Aging                    | 3                       | 441                      | 118           | 11608          | 0.0254237  | 0.8313381 | 1       |
| ko04213    | Longevity regulating pathway - multiple | Organismal Systems                   | Aging                    | 2                       | 441                      | 79            | 11608          | 0.0253165  | 0.8077961 | 1       |
| ko04214    | Apoptosis - fly                         | Cellular Processes                   | Cell growth and death    | 2                       | 441                      | 72            | 11608          | 0.0277778  | 0.7645666 | 1       |
| ko04217    | Necroptosis                             | Cellular Processes                   | Cell growth and death    | 8                       | 441                      | 223           | 11608          | 0.0358744  | 0.6163334 | 1       |
| ko04218    | Cellular senescence                     | Cellular Processes                   | Cell growth and death    | 6                       | 441                      | 212           | 11608          | 0.0283019  | 0.821456  | 1       |
| ko04260    | Cardiac muscle contraction              | Organismal Systems                   | Circulatory system       | 2                       | 441                      | 86            | 11608          | 0.0232558  | 0.84382   | 1       |
| ko04261    | Adrenergic signaling in cardiomyocytes  | Organismal Systems                   | Circulatory system       | 4                       | 441                      | 192           | 11608          | 0.0208333  | 0.9374537 | 1       |
| ko04320    | Dorso-ventral axis formation            | Organismal Systems                   | Development              | 2                       | 441                      | 96            | 11608          | 0.0208333  | 0.8847078 | 1       |
| ko04330    | Notch signaling pathway                 | Environmental Information Processing | Signal transduction      | 3                       | 441                      | 78            | 11608          | 0.0384615  | 0.5734942 | 1       |
| ko04370    | VEGF signaling pathway                  | Environmental Information Processing | Signal transduction      | 3                       | 441                      | 72            | 11608          | 0.0416667  | 0.5189916 | 1       |

| Pathway ID | Pathway Name                               | Level 1                              | Level 2                         | Term Candidate Gene Num | Total Candidate Gene Num | Term Gene Num | Total Gene Num | Rich Ratio | P value   | Q value |
|------------|--------------------------------------------|--------------------------------------|---------------------------------|-------------------------|--------------------------|---------------|----------------|------------|-----------|---------|
| ko04391    | Hippo signaling pathway - fly              | Environmental Information Processing | Signal transduction             | 2                       | 441                      | 120           | 11608          | 0.0166667  | 0.9458561 | 1       |
| ko04520    | Adherens junction                          | Cellular Processes                   | Cellular community - eukaryotes | 5                       | 441                      | 162           | 11608          | 0.0308642  | 0.7423009 | 1       |
| ko04530    | Tight junction                             | Cellular Processes                   | Cellular community - eukaryotes | 8                       | 441                      | 318           | 11608          | 0.0251572  | 0.9209677 | 1       |
| ko04540    | Gap junction                               | Cellular Processes                   | Cellular community - eukaryotes | 1                       | 441                      | 107           | 11608          | 0.0093458  | 0.9844499 | 1       |
| ko04550    | Signaling pathways regulating pluripotency | Cellular Processes                   | Cellular community - eukaryotes | 3                       | 441                      | 160           | 11608          | 0.01875    | 0.9458788 | 1       |
| ko04611    | Platelet activation                        | Organismal Systems                   | Immune system                   | 12                      | 441                      | 361           | 11608          | 0.033241   | 0.7237169 | 1       |
| ko04612    | Antigen processing and presentation        | Organismal Systems                   | Immune system                   | 2                       | 441                      | 105           | 11608          | 0.0190476  | 0.9128059 | 1       |
| ko04622    | RIG-I-like receptor signaling pathway      | Organismal Systems                   | Immune system                   | 4                       | 441                      | 105           | 11608          | 0.0380952  | 0.5690113 | 1       |
| ko04624    | Toll and Imd signaling pathway             | Organismal Systems                   | Immune system                   | 1                       | 441                      | 66            | 11608          | 0.0151515  | 0.9229735 | 1       |
| ko04658    | Th1 and Th2 cell differentiation           | Organismal Systems                   | Immune system                   | 3                       | 441                      | 123           | 11608          | 0.0243902  | 0.851624  | 1       |
| ko04664    | Fc epsilon RI signaling pathway            | Organismal Systems                   | Immune system                   | 3                       | 441                      | 84            | 11608          | 0.0357143  | 0.6239937 | 1       |
| ko04666    | Fc gamma R-mediated phagocytosis           | Organismal Systems                   | Immune system                   | 5                       | 441                      | 177           | 11608          | 0.0282486  | 0.8078514 | 1       |
| ko04670    | Leukocyte transendothelial                 | Organismal Systems                   | Immune system                   | 6                       | 441                      | 171           | 11608          | 0.0350877  | 0.6362747 | 1       |
| ko04714    | Thermogenesis                              | Organismal Systems                   | Environmental adaptation        | 7                       | 441                      | 290           | 11608          | 0.0241379  | 0.9285023 | 1       |
| ko04720    | Long-term potentiation                     | Organismal Systems                   | Nervous system                  | 1                       | 441                      | 93            | 11608          | 0.0107527  | 0.9731278 | 1       |
| ko04721    | Synaptic vesicle cycle                     | Organismal Systems                   | Nervous system                  | 1                       | 441                      | 73            | 11608          | 0.0136986  | 0.9413624 | 1       |
| ko04722    | Neurotrophin signaling pathway             | Organismal Systems                   | Nervous system                  | 6                       | 441                      | 174           | 11608          | 0.0344828  | 0.6529438 | 1       |

| Pathway ID | Pathway Name                            | Level 1            | Level 2          | Term Candidate Gene Num | Total Candidate Gene Num | Term Gene Num | Total Gene Num | Rich Ratio | P value   | Q value |
|------------|-----------------------------------------|--------------------|------------------|-------------------------|--------------------------|---------------|----------------|------------|-----------|---------|
| ko04723    | Retrograde endocannabinoid              | Organismal Systems | Nervous system   | 6                       | 441                      | 161           | 11608          | 0.0372671  | 0.5774764 | 1       |
| ko04727    | GABAergic synapse                       | Organismal Systems | Nervous system   | 4                       | 441                      | 106           | 11608          | 0.0377358  | 0.5765601 | 1       |
| ko04728    | Dopaminergic synapse                    | Organismal Systems | Nervous system   | 4                       | 441                      | 175           | 11608          | 0.0228571  | 0.9041106 | 1       |
| ko04740    | Olfactory transduction                  | Organismal Systems | Sensory system   | 9                       | 441                      | 1769          | 11608          | 0.0050876  | 1         | 1       |
| ko04744    | Phototransduction                       | Organismal Systems | Sensory system   | 2                       | 441                      | 54            | 11608          | 0.037037   | 0.6137623 | 1       |
| ko04745    | Phototransduction - fly                 | Organismal Systems | Sensory system   | 1                       | 441                      | 62            | 11608          | 0.016129   | 0.9099878 | 1       |
| ko04750    | Inflammatory mediator regulation of TRP | Organismal Systems | Sensory system   | 5                       | 441                      | 146           | 11608          | 0.0342466  | 0.6558196 | 1       |
| ko04810    | Regulation of actin cytoskeleton        | Cellular Processes | Cell motility    | 8                       | 441                      | 356           | 11608          | 0.0224719  | 0.9638838 | 1       |
| ko04910    | Insulin signaling pathway               | Organismal Systems | Endocrine system | 4                       | 441                      | 197           | 11608          | 0.0203046  | 0.9450331 | 1       |
| ko04911    | Insulin secretion                       | Organismal Systems | Endocrine system | 4                       | 441                      | 130           | 11608          | 0.0307692  | 0.7332351 | 1       |
| ko04912    | GnRH signaling pathway                  | Organismal Systems | Endocrine system | 4                       | 441                      | 133           | 11608          | 0.0300752  | 0.749375  | 1       |
| ko04914    | Progesterone-mediated oocyte maturation | Organismal Systems | Endocrine system | 1                       | 441                      | 115           | 11608          | 0.0086957  | 0.9886277 | 1       |
| ko04915    | Estrogen signaling pathway              | Organismal Systems | Endocrine system | 6                       | 441                      | 194           | 11608          | 0.0309278  | 0.7515674 | 1       |
| ko04916    | Melanogenesis                           | Organismal Systems | Endocrine system | 3                       | 441                      | 136           | 11608          | 0.0220588  | 0.8947118 | 1       |
| ko04917    | Prolactin signaling pathway             | Organismal Systems | Endocrine system | 1                       | 441                      | 90            | 11608          | 0.0111111  | 0.9697885 | 1       |
| ko04918    | Thyroid hormone synthesis               | Organismal Systems | Endocrine system | 3                       | 441                      | 91            | 11608          | 0.032967   | 0.6775436 | 1       |
| ko04919    | Thyroid hormone signaling pathway       | Organismal Systems | Endocrine system | 2                       | 441                      | 161           | 11608          | 0.0124224  | 0.9860423 | 1       |

| Pathway ID | Pathway Name                                 | Level 1            | Level 2                          | Term Candidate Gene Num | Total Candidate Gene Num | Term Gene Num | Total Gene Num | Rich Ratio | P value   | Q value |
|------------|----------------------------------------------|--------------------|----------------------------------|-------------------------|--------------------------|---------------|----------------|------------|-----------|---------|
| ko04922    | Glucagon signaling pathway                   | Organismal Systems | Endocrine system                 | 4                       | 441                      | 133           | 11608          | 0.0300752  | 0.749375  | 1       |
| ko04925    | Aldosterone synthesis and secretion          | Organismal Systems | Endocrine system                 | 4                       | 441                      | 131           | 11608          | 0.0305344  | 0.7386998 | 1       |
| ko04927    | Cortisol synthesis and secretion             | Organismal Systems | Endocrine system                 | 1                       | 441                      | 77            | 11608          | 0.012987   | 0.9498294 | 1       |
| ko04931    | Insulin resistance                           | Human Diseases     | Endocrine and metabolic diseases | 4                       | 441                      | 130           | 11608          | 0.0307692  | 0.7332351 | 1       |
| ko04932    | Non-alcoholic fatty liver disease (NAFLD)    | Human Diseases     | Endocrine and metabolic diseases | 5                       | 441                      | 180           | 11608          | 0.0277778  | 0.8192348 | 1       |
| ko04934    | Cushing's syndrome                           | Human Diseases     | Endocrine and metabolic diseases | 5                       | 441                      | 203           | 11608          | 0.0246305  | 0.8894666 | 1       |
| ko04940    | Type I diabetes mellitus                     | Human Diseases     | Endocrine and metabolic diseases | 2                       | 441                      | 76            | 11608          | 0.0263158  | 0.7902093 | 1       |
| ko04960    | Aldosterone-regulated sodium reabsorption    | Organismal Systems | Excretory system                 | 1                       | 441                      | 40            | 11608          | 0.025      | 0.7881592 | 1       |
| ko04961    | Endocrine and other factor-regulated calcium | Organismal Systems | Excretory system                 | 2                       | 441                      | 59            | 11608          | 0.0338983  | 0.6618902 | 1       |
| ko04970    | Salivary secretion                           | Organismal Systems | Digestive system                 | 7                       | 441                      | 200           | 11608          | 0.035      | 0.6411464 | 1       |
| ko04971    | Gastric acid secretion                       | Organismal Systems | Digestive system                 | 2                       | 441                      | 119           | 11608          | 0.0168067  | 0.9440872 | 1       |
| ko05010    | Alzheimer's disease                          | Human Diseases     | Neurodegenerative diseases       | 4                       | 441                      | 235           | 11608          | 0.0170213  | 0.9803075 | 1       |
| ko05014    | Amyotrophic lateral sclerosis (ALS)          | Human Diseases     | Neurodegenerative diseases       | 2                       | 441                      | 93            | 11608          | 0.0215054  | 0.8736147 | 1       |
| ko05016    | Huntington's disease                         | Human Diseases     | Neurodegenerative diseases       | 11                      | 441                      | 379           | 11608          | 0.0290237  | 0.8584874 | 1       |
| ko05034    | Alcoholism                                   | Human Diseases     | Substance dependence             | 7                       | 441                      | 228           | 11608          | 0.0307018  | 0.7685664 | 1       |
| ko05130    | Pathogenic Escherichia coli infection        | Human Diseases     | Infectious diseases: Bacterial   | 1                       | 441                      | 112           | 11608          | 0.0089286  | 0.9872116 | 1       |
| ko05131    | Shigellosis                                  | Human Diseases     | Infectious diseases: Bacterial   | 4                       | 441                      | 154           | 11608          | 0.025974   | 0.8420316 | 1       |

| Pathway ID | Pathway Name                 | Level 1        | Level 2                    | Term Candidate Gene Num | Total Candidate Gene Num | Term Gene Num | Total Gene Num | Rich Ratio | P value   | Q value |
|------------|------------------------------|----------------|----------------------------|-------------------------|--------------------------|---------------|----------------|------------|-----------|---------|
| ko05160    | Hepatitis C                  | Human Diseases | Infectious diseases: Viral | 4                       | 441                      | 170           | 11608          | 0.0235294  | 0.8916787 | 1       |
| ko05164    | Influenza A                  | Human Diseases | Infectious diseases: Viral | 9                       | 441                      | 247           | 11608          | 0.0364372  | 0.5989564 | 1       |
| ko05168    | Herpes simplex infection     | Human Diseases | Infectious diseases: Viral | 15                      | 441                      | 414           | 11608          | 0.0362319  | 0.6130231 | 1       |
| ko05203    | Viral carcinogenesis         | Human Diseases | Cancers: Overview          | 5                       | 441                      | 244           | 11608          | 0.0204918  | 0.9579265 | 1       |
| ko05214    | Glioma                       | Human Diseases | Cancers: Specific types    | 2                       | 441                      | 113           | 11608          | 0.0176991  | 0.9322668 | 1       |
| ko05215    | Prostate cancer              | Human Diseases | Cancers: Specific types    | 3                       | 441                      | 117           | 11608          | 0.025641   | 0.8270067 | 1       |
| ko05216    | Thyroid cancer               | Human Diseases | Cancers: Specific types    | 2                       | 441                      | 48            | 11608          | 0.0416667  | 0.5493258 | 1       |
| ko05218    | Melanoma                     | Human Diseases | Cancers: Specific types    | 3                       | 441                      | 84            | 11608          | 0.0357143  | 0.6239937 | 1       |
| ko05221    | Acute myeloid leukemia       | Human Diseases | Cancers: Specific types    | 2                       | 441                      | 76            | 11608          | 0.0263158  | 0.7902093 | 1       |
| ko05223    | Non-small cell lung cancer   | Human Diseases | Cancers: Specific types    | 2                       | 441                      | 77            | 11608          | 0.025974   | 0.7962235 | 1       |
| ko05225    | Hepatocellular carcinoma     | Human Diseases | Cancers: Specific types    | 8                       | 441                      | 223           | 11608          | 0.0358744  | 0.6163334 | 1       |
| ko05231    | Choline metabolism in cancer | Human Diseases | Cancers: Overview          | 4                       | 441                      | 178           | 11608          | 0.0224719  | 0.91095   | 1       |
| ko05332    | Graft-versus-host disease    | Human Diseases | Immune diseases            | 2                       | 441                      | 60            | 11608          | 0.0333333  | 0.6709174 | 1       |
