# Supplementary material for: Transcriptome Profile Analysis of Intestinal Upper Villus Epithelial Cells and Crypt Epithelial Cells of Suckling Piglets
Source: MDPI journal article supplement (doi:10.3390/ani12182324), 2022-09-07
Supplement: s1 [file s1]

Figure S2. The down-regulation DEGs of the crypt cells (F3) compared with the villus upper cells (F1)

| Gene ID   | F1 FPKM | F3 FPKM | log2(F3/F1) | Qvalue(F1-vs-F3) | Pvalue(F1-vs-F3) | Other Gene ID |
|-----------|---------|---------|-------------|------------------|------------------|---------------|
| 100037275 | 1.122   | 0.482   | -1.3293259  | 5.26E-14         | 2.55E-14         | SPARCL1       |
| 100037946 | 0.284   | 0.096   | -1.5169869  | 2.43E-10         | 1.46E-10         | KCND3         |
| 100037954 | 0.488   | 0.23    | -1.1552965  | 5.08E-05         | 4.83E-05         | C8B           |
| 100037955 | 2.694   | 0.502   | -2.4066645  | 9.97E-20         | 3.74E-20         | C8G           |
| 100101551 | 0.216   | 0.094   | -1.2955259  | 8.34E-09         | 5.56E-09         | COL6A3        |
| 100125375 | 0.468   | 0.148   | -1.6287344  | 4.24E-08         | 2.99E-08         | CAV2          |
| 100125829 | 554.3   | 267.896 | -1.0495586  | 0                | 0                | MUC13         |
| 100125974 | 2.53    | 0.844   | -1.5937688  | 1.80E-23         | 5.97E-24         | SPO11         |
| 100126276 | 0.438   | 0.296   | -1.0153045  | 3.61E-06         | 3.03E-06         | WNT10B        |
| 100126281 | 116.116 | 40.12   | -1.5261663  | 0                | 0                | CYP3A46       |
| 100126282 | 3.116   | 1.058   | -1.5423196  | 1.77E-35         | 4.21E-36         | CYP27A1       |
| 100126283 | 4.558   | 1.44    | -1.570883   | 1.45E-41         | 3.04E-42         | AQP7          |
| 100126284 | 0.16    | 0.03    | -2.0277465  | 7.84E-06         | 6.81E-06         | PTGIS         |
| 100126844 | 16.916  | 6.628   | -1.3664372  | 3.99E-131        | 3.17E-132        | GATM          |
| 100134959 | 48.164  | 19.194  | -1.3092187  | 8.65E-173        | 5.30E-174        | G6PC          |
| 100144303 | 147.07  | 72.556  | -1.0042316  | 0                | 0                | ACE2          |
| 100144468 | 2.674   | 1.292   | -1.0446979  | 1.62E-13         | 8.05E-14         | CYP3A22       |
| 100144531 | 66.816  | 24.626  | -1.4340834  | 0                | 0                | PCK1          |
| 100144588 | 10.344  | 3.936   | -1.385105   | 5.17E-102        | 5.17E-103        | SLC3A1        |
| 100144620 | 27.048  | 10.408  | -1.3863581  | 4.11E-130        | 3.28E-131        | AQP10         |
| 100151780 | 31.592  | 9.256   | -1.7596044  | 0                | 0                | KCNJ13        |
| 100151853 | 1.244   | 0.362   | -1.778387   | 1.01E-10         | 5.91E-11         | C15H2orf66    |
| 100152001 | 3.826   | 1.994   | -1.030553   | 1.64E-44         | 3.24E-45         | COL3A1        |
| 100152015 | 0.996   | 0.432   | -1.1108316  | 3.86E-06         | 3.25E-06         | HMX3          |
| 100152067 | 1.588   | 0.54    | -1.5153526  | 6.35E-31         | 1.70E-31         | ADCY4         |
| 100152112 | 6.028   | 2.45    | -1.3245998  | 4.89E-224        | 2.43E-225        | ABCA1         |
| 100152205 | 36.69   | 16.12   | -1.1827538  | 0                | 0                | DST           |
| 100152401 | 3.094   | 0.928   | -1.8670905  | 8.26E-61         | 1.27E-61         | POSTN         |
| 100152607 | 1.124   | 0.44    | -1.4913357  | 6.82E-11         | 3.93E-11         | LUM           |
| 100152930 | 2.022   | 0.998   | -1.0178157  | 5.78E-25         | 1.83E-25         | ADGRF5        |
| 100152957 | 0.326   | 0.096   | -1.6720269  | 2.14E-06         | 1.75E-06         | EPB42         |
| 100153434 | 32.684  | 15.668  | -1.0604176  | 0                | 0                | ABHD2         |
| 100153454 | 1.158   | 0.614   | -1.0247851  | 5.88E-18         | 2.39E-18         | COL4A2        |

| Gene ID   | F1 FPKM | F3 FPKM | log2(F3/F1) | Qvalue(F1-vs-F3) | Pvalue(F1-vs-F3) | Other Gene ID |
|-----------|---------|---------|-------------|------------------|------------------|---------------|
| 100153508 | 0.06    | 0.014   | -2.3496745  | 0.000457299      | 0.000489061      | NPR1          |
| 100153645 | 3.892   | 1.604   | -1.2303756  | 1.01E-11         | 5.52E-12         | CALB1         |
| 100153739 | 0.092   | 0.02    | -2.0277465  | 7.84E-06         | 6.81E-06         | CCDC13        |
| 100153854 | 1.008   | 0.236   | -2.0650214  | 1.60E-12         | 8.36E-13         | LOC100153854  |
| 100153917 | 0.172   | 0.06    | -1.5423196  | 7.14E-05         | 6.90E-05         | SLITRK6       |
| 100153974 | 0.082   | 0.04    | -1.1921484  | 0.000815964      | 0.000905855      | CTNNA3        |
| 100154297 | 0.712   | 0.272   | -1.4189133  | 2.60E-08         | 1.81E-08         | AMHR2         |
| 100154315 | 0.084   | 0.008   | -3.44418    | 7.13E-05         | 6.89E-05         | DCST2         |
| 100154502 | 320.22  | 134.38  | -1.2589029  | 0                | 0                | PRAP1         |
| 100154581 | 0.314   | 0.144   | -1.1881373  | 5.79E-07         | 4.52E-07         | LAMA4         |
| 100154587 | 0.072   | 0.01    | -2.9573571  | 0.000523057      | 0.000565448      | KCNMB4        |
| 100154624 | 482.936 | 204.33  | -1.2669212  | 0                | 0                | CLCA4         |
| 100154649 | 0.276   | 0.084   | -1.4373019  | 0.00017618       | 0.000177978      | RAI2          |
| 100154895 | 0.286   | 0.132   | -1.0898074  | 0.000826277      | 0.000918621      | TAL2          |
| 100154962 | 2.94    | 0.966   | -1.5840686  | 1.15E-45         | 2.21E-46         | PTPRR         |
| 100155042 | 0.324   | 0.138   | -1.2212078  | 3.67E-05         | 3.42E-05         | BOLL          |
| 100155204 | 2.834   | 0.89    | -1.6619012  | 2.04E-36         | 4.75E-37         | ZBBX          |
| 100155308 | 0.164   | 0.008   | -4.2231213  | 6.33E-06         | 5.45E-06         | LOC100155308  |
| 100155458 | 0.22    | 0.096   | -1.1800113  | 8.35E-06         | 7.27E-06         | CLVS2         |
| 100155607 | 0.718   | 0.278   | -1.3250889  | 1.53E-10         | 9.05E-11         | MATN2         |
| 100155660 | 0.32    | 0.156   | -1.2695383  | 5.13E-05         | 4.88E-05         | CD93          |
| 100155871 | 1.612   | 0.226   | -2.8705042  | 1.57E-70         | 2.16E-71         | SLC16A9       |
| 100156014 | 1.336   | 0.572   | -1.2197747  | 7.38E-10         | 4.56E-10         | IL17RB        |
| 100156181 | 0.364   | 0.088   | -2.1162447  | 9.07E-33         | 2.30E-33         | PTPRB         |
| 100156333 | 0.198   | 0.042   | -2.0803479  | 0.000282794      | 0.000294119      | LOC100156333  |
| 100156404 | 1.688   | 0.748   | -1.1434534  | 1.58E-08         | 1.08E-08         | PGF           |
| 100156419 | 1.332   | 0.516   | -1.3883244  | 7.38E-57         | 1.19E-57         | HOMER2        |
| 100156461 | 14.518  | 3.912   | -1.9152931  | 0                | 0                | BMP1          |
| 100156478 | 0.028   | 0.01    | -1.764712   | 0.000740985      | 0.000818859      | DNAH8         |
| 100156646 | 1.244   | 0.622   | -1.0199851  | 6.60E-25         | 2.09E-25         | SVOP          |
| 100157065 | 11.658  | 3.964   | -1.5595964  | 0                | 0                | ASAH2         |
| 100157073 | 0.456   | 0.196   | -1.1876547  | 0.000232704      | 0.00023909       | AGT           |
| 100157235 | 0.362   | 0.098   | -1.7585158  | 2.97E-06         | 2.47E-06         | ITIH3         |
| 100157319 | 7.938   | 2.508   | -1.7346172  | 1.56E-51         | 2.75E-52         | SDR16C5       |

| Gene ID   | F1 FPKM | F3 FPKM | log2(F3/F1) | Qvalue(F1-vs-F3) | Pvalue(F1-vs-F3) | Other Gene ID |
|-----------|---------|---------|-------------|------------------|------------------|---------------|
| 100157330 | 0.22    | 0.108   | -1.0206953  | 7.84E-09         | 5.23E-09         | CLSTN2        |
| 100157365 | 0.426   | 0.162   | -1.495777   | 1.30E-05         | 1.15E-05         | CLEC14A       |
| 100157523 | 13.198  | 4.928   | -1.4468592  | 2.24E-155        | 1.48E-156        | GGT5          |
| 100157775 | 5.476   | 2.52    | -1.113228   | 6.83E-145        | 4.87E-146        | TRPM6         |
| 100157784 | 0.252   | 0.126   | -1.0552522  | 5.83E-08         | 4.15E-08         | SV2B          |
| 100158056 | 21.044  | 10.026  | -1.027092   | 9.11E-173        | 5.60E-174        | PFKFB4        |
| 100158128 | 0.114   | 0.008   | -3.8555655  | 0.000200765      | 0.000204355      | LMAN1L        |
| 100158166 | 2.25    | 1.074   | -1.122168   | 7.92E-17         | 3.36E-17         | RFLNA         |
| 100158187 | 0.268   | 0.126   | -1.1617156  | 0.00069663       | 0.000766512      | PLS3          |
| 100169744 | 2.958   | 1.272   | -1.2079006  | 1.26E-11         | 6.95E-12         | CXCL11        |
| 100170651 | 6.998   | 1.192   | -2.6023444  | 2.65E-91         | 2.90E-92         | SLC30A2       |
| 100233169 | 180.446 | 69.004  | -1.360389   | 0                | 0                | ACSL3         |
| 100233182 | 22.96   | 8.984   | -1.188358   | 3.48E-237        | 1.62E-238        | GK            |
| 100270723 | 1.38    | 0.208   | -2.6418553  | 6.81E-08         | 4.89E-08         | RBP7          |
| 100271745 | 1.562   | 0.61    | -1.2631656  | 3.80E-06         | 3.19E-06         | TCAP          |
| 100286744 | 4.344   | 1.518   | -1.4964431  | 1.07E-43         | 2.15E-44         | MUC12         |
| 100294675 | 32.452  | 14.162  | -1.2029343  | 1.15E-146        | 8.13E-148        | DGAT2         |
| 100294688 | 397.29  | 190.422 | -1.0866095  | 0                | 0                | UBD           |
| 100337678 | 0.666   | 0.228   | -1.4907893  | 3.50E-05         | 3.26E-05         | PNCK          |
| 100381252 | 3.416   | 1.716   | -1.1126354  | 1.12E-05         | 9.90E-06         | APOC2         |
| 100510957 | 0.31    | 0.156   | -1.0217901  | 0.00071193       | 0.000784378      | ACSM2B        |
| 100511263 | 0.824   | 0.306   | -1.4565898  | 4.31E-11         | 2.46E-11         | KCNC3         |
| 100511353 | 0.318   | 0.164   | -1.0207825  | 2.01E-08         | 1.38E-08         | ADAMTS12      |
| 100511431 | 0.04    | 0.008   | -2.4744156  | 0.000730302      | 0.000806207      | CRB2          |
| 100511434 | 2.406   | 1.07    | -1.2688182  | 2.18E-12         | 1.15E-12         | EGFL7         |
| 100511536 | 189.398 | 75.144  | -1.3380311  | 0                | 0                | MME           |
| 100511582 | 0.338   | 0.122   | -1.4098693  | 5.99E-08         | 4.27E-08         | SYT2          |
| 100511633 | 1.076   | 0.454   | -1.2248423  | 5.29E-07         | 4.11E-07         | RDH16         |
| 100511642 | 13.712  | 4.844   | -1.478369   | 0                | 0                | LAMA3         |
| 100511654 | 0.076   | 0.006   | -3.6577968  | 0.000607619      | 0.000663114      | SERTAD4       |
| 100511672 | 0.124   | 0.02    | -2.6328257  | 0.00084381       | 0.00093897       | SLC24A5       |
| 100511847 | 0.138   | 0.054   | -1.4318653  | 0.000121776      | 0.000120796      | CPED1         |
| 100511870 | 0.59    | 0.228   | -1.3052804  | 0.000150039      | 0.000150374      | GNG13         |
| 100512046 | 0.584   | 0.154   | -2.0162508  | 3.23E-09         | 2.09E-09         | EFEMP1        |

| Gene ID   | F1 FPKM | F3 FPKM | log2(F3/F1) | Qvalue(F1-vs-F3) | Pvalue(F1-vs-F3) | Other Gene ID |
|-----------|---------|---------|-------------|------------------|------------------|---------------|
| 100512361 | 0.492   | 0.124   | -2.0966319  | 3.51E-19         | 1.35E-19         | PPFIA4        |
| 100512640 | 0.81    | 0.23    | -1.8902429  | 2.15E-21         | 7.62E-22         | CCDC129       |
| 100512657 | 0.334   | 0.1     | -1.7349647  | 1.66E-05         | 1.49E-05         | WIF1          |
| 100512756 | 0.568   | 0.194   | -1.5828402  | 5.31E-09         | 3.49E-09         | MEIS2         |
| 100512772 | 0.156   | 0.03    | -2.2792852  | 0.000184846      | 0.000187268      | TMEM270       |
| 100512834 | 0.076   | 0.024   | -1.6678505  | 0.000256814      | 0.000265499      | KIRREL        |
| 100513233 | 0.096   | 0       | -5.1192448  | 1.59E-05         | 1.42E-05         | LOC100513233  |
| 100513377 | 0.242   | 0.108   | -1.1228933  | 2.85E-07         | 2.16E-07         | IL17RD        |
| 100513444 | 0.212   | 0.066   | -1.7238125  | 2.23E-10         | 1.34E-10         | SLIT3         |
| 100513689 | 4.194   | 1.826   | -1.2009723  | 6.70E-85         | 7.76E-86         | NCKAP5        |
| 100513769 | 0.182   | 0.06    | -1.6802323  | 7.35E-09         | 4.89E-09         | TAS2R16       |
| 100513818 | 1.91    | 0.682   | -1.496026   | 2.85E-20         | 1.05E-20         | ZMYND15       |
| 100513844 | 1       | 0.438   | -1.1555752  | 6.43E-06         | 5.54E-06         | LOC100513844  |
| 100513853 | 0.35    | 0.15    | -1.2274463  | 1.17E-07         | 8.59E-08         | ANTXR1        |
| 100513942 | 0.258   | 0.052   | -2.1100147  | 0.000398899      | 0.000422964      | LOC100513942  |
| 100514201 | 5.672   | 1.926   | -1.519659   | 6.48E-81         | 8.04E-82         | FRMD1         |
| 100514396 | 0.576   | 0.28    | -1.1272821  | 8.94E-10         | 5.56E-10         | NYAP1         |
| 100514537 | 1.604   | 0.72    | -1.181117   | 2.65E-24         | 8.53E-25         | KCNH6         |
| 100514576 | 4.88    | 2.468   | -1.009867   | 8.98E-48         | 1.67E-48         | ADAMTSL4      |
| 100514726 | 41.008  | 10.986  | -1.8920591  | 0                | 0                | ENPP7         |
| 100514743 | 4.186   | 1.494   | -1.4904686  | 7.24E-124        | 6.07E-125        | WIPF3         |
| 100514914 | 0.482   | 0.084   | -2.4846041  | 1.54E-14         | 7.22E-15         | CATSPERE      |
| 100514979 | 1.812   | 0.658   | -1.4565125  | 5.59E-25         | 1.77E-25         | LOC100514979  |
| 100515047 | 0.344   | 0.14    | -1.1208949  | 1.29E-06         | 1.03E-06         | MAGI2         |
| 100515049 | 2.294   | 0.604   | -1.9214376  | 7.71E-71         | 1.06E-71         | LOC100515049  |
| 100515143 | 1.088   | 0.448   | -1.2748466  | 5.24E-26         | 1.61E-26         | RNF207        |
| 100515194 | 0.406   | 0.162   | -1.2172243  | 5.56E-06         | 4.76E-06         | ABLIM3        |
| 100515310 | 3.132   | 1.508   | -1.0392013  | 1.65E-38         | 3.69E-39         | WDR97         |
| 100515322 | 0.236   | 0.082   | -1.4598575  | 6.29E-06         | 5.41E-06         | CDH2          |
| 100515336 | 2.228   | 1.166   | -1.0446164  | 6.63E-36         | 1.56E-36         | COL4A1        |
| 100515394 | 1.15    | 0.442   | -1.4111101  | 2.06E-10         | 1.23E-10         | LOC100515394  |
| 100515404 | 0.308   | 0.132   | -1.3149091  | 4.68E-06         | 3.97E-06         | ITIH5         |
| 100515407 | 0.1     | 0.02    | -2.237465   | 1.83E-05         | 1.65E-05         | HSF5          |
| 100515575 | 0.628   | 0.276   | -1.1617156  | 0.00069663       | 0.000766512      | 4-Sep         |

| Gene ID   | F1 FPKM | F3 FPKM | log2(F3/F1) | Qvalue(F1-vs-F3) | Pvalue(F1-vs-F3) | Other Gene ID |
|-----------|---------|---------|-------------|------------------|------------------|---------------|
| 100515579 | 2.698   | 0       | -11.160399  | 8.04E-159        | 5.22E-160        | LOC100515579  |
| 100515668 | 0.606   | 0.286   | -1.0571762  | 1.63E-07         | 1.21E-07         | BMP8A         |
| 100515715 | 0.202   | 0.046   | -2.0898074  | 1.24E-07         | 9.07E-08         | PDE6A         |
| 100515788 | 3.914   | 1.446   | -1.450314   | 9.70E-08         | 7.07E-08         | LOC100515788  |
| 100515852 | 0.494   | 0.22    | -1.1166527  | 2.55E-05         | 2.34E-05         | LOC100515852  |
| 100515955 | 0.54    | 0.172   | -1.6163202  | 3.37E-15         | 1.54E-15         | PTPRU         |
| 100515970 | 1.694   | 0.744   | -1.1854317  | 1.14E-21         | 4.00E-22         | OSBP2         |
| 100516141 | 120.128 | 47.734  | -1.3258841  | 0                | 0                | MEP1B         |
| 100516302 | 0.27    | 0       | -4.4167887  | 0.000823765      | 0.000915232      | LOC100516302  |
| 100516366 | 0.326   | 0.12    | -1.581848   | 0.000353173      | 0.000372075      | DPT           |
| 100516653 | 0.254   | 0.1     | -1.2893494  | 2.75E-09         | 1.77E-09         | CCDC170       |
| 100516697 | 0.552   | 0.258   | -1.1061851  | 2.12E-26         | 6.45E-27         | KALRN         |
| 100516922 | 0.302   | 0.154   | -1.1856261  | 2.30E-05         | 2.10E-05         | MMRN1         |
| 100517042 | 0.114   | 0.038   | -1.5176576  | 7.66E-05         | 7.43E-05         | GABRG1        |
| 100517148 | 1.5     | 0.462   | -1.6611559  | 1.59E-18         | 6.29E-19         | SCGB1C1       |
| 100517588 | 0.598   | 0.284   | -1.1939781  | 7.62E-11         | 4.41E-11         | DNAAF1        |
| 100517626 | 1.278   | 0.608   | -1.0202126  | 2.90E-06         | 2.41E-06         | ARL13A        |
| 100517800 | 0.724   | 0.316   | -1.1163418  | 2.02E-06         | 1.65E-06         | LOC100517800  |
| 100518179 | 0.164   | 0.064   | -1.49341    | 2.13E-05         | 1.94E-05         | FLT4          |
| 100518683 | 0.158   | 0.026   | -2.5423196  | 4.79E-08         | 3.40E-08         | PRG4          |
| 100518817 | 0.478   | 0.186   | -1.4230207  | 4.03E-05         | 3.78E-05         | ALAS2         |
| 100519011 | 26.03   | 11.486  | -1.1901142  | 0                | 0                | SLC5A12       |
| 100519341 | 0.858   | 0.39    | -1.0959034  | 1.64E-07         | 1.22E-07         | IDO2          |
| 100519488 | 5.65    | 0.744   | -2.8446693  | 3.48E-211        | 1.82E-212        | MOV10L1       |
| 100519519 | 0.026   | 0.01    | -1.1479956  | 2.18E-08         | 1.50E-08         | TTN           |
| 100519539 | 3.044   | 1.064   | -1.5479136  | 3.12E-94         | 3.32E-95         | KLHL3         |
| 100519570 | 0.22    | 0.108   | -1.0868844  | 0.000483709      | 0.000519548      | KLLN          |
| 100519724 | 1.138   | 0.506   | -1.1676283  | 9.47E-15         | 4.41E-15         | MAP6          |
| 100520061 | 0.06    | 0.014   | -2.2792852  | 0.000184846      | 0.000187268      | ATP2B3        |
| 100520186 | 7.164   | 3.014   | -1.1858209  | 9.47E-32         | 2.47E-32         | SH2D6         |
| 100520235 | 0.936   | 0.27    | -1.6735642  | 5.36E-07         | 4.17E-07         | PDLIM4        |
| 100520273 | 75.136  | 14.02   | -2.4124389  | 0                | 0                | LOC100520273  |
| 100520329 | 0.11    | 0.03    | -2.0263885  | 0.000257073      | 0.000265803      | LOC100520329  |
| 100520648 | 0.278   | 0.018   | -4.04482    | 1.82E-08         | 1.25E-08         | SLC6A18       |

| Gene ID   | F1 FPKM | F3 FPKM | log2(F3/F1) | Qvalue(F1-vs-F3) | Pvalue(F1-vs-F3) | Other Gene ID |
|-----------|---------|---------|-------------|------------------|------------------|---------------|
| 100520667 | 1.882   | 0.868   | -1.1651454  | 2.15E-09         | 1.38E-09         | ACTG2         |
| 100520976 | 0.8     | 0.366   | -1.0654151  | 3.37E-16         | 1.47E-16         | SLC13A5       |
| 100521229 | 3.436   | 1.578   | -1.063002   | 3.29E-20         | 1.21E-20         | LOC100521229  |
| 100521401 | 7.016   | 2.746   | -1.3231296  | 5.35E-27         | 1.60E-27         | TMIGD1        |
| 100521529 | 0.218   | 0.104   | -1.0738429  | 0.000236699      | 0.000243435      | LOC100521529  |
| 100521710 | 3.996   | 1.896   | -1.0678309  | 1.61E-73         | 2.15E-74         | NAIF1         |
| 100521795 | 1.908   | 0.786   | -1.0004258  | 7.58E-09         | 5.04E-09         | SYNE4         |
| 100521917 | 0.108   | 0.054   | -1.09547    | 1.24E-05         | 1.10E-05         | PTPN14        |
| 100521955 | 0.182   | 0.064   | -1.3729877  | 0.000724093      | 0.000798828      | MEIKIN        |
| 100522021 | 30.738  | 15.026  | -1.0361556  | 0                | 0                | LRRC66        |
| 100522035 | 0.552   | 0.24    | -1.2250104  | 2.02E-06         | 1.65E-06         | TM4SF1        |
| 100522166 | 31.24   | 10.354  | -1.5977288  | 0                | 0                | TMEM37        |
| 100522231 | 33.148  | 15.518  | -1.0826378  | 4.56E-218        | 2.30E-219        | SLC28A2       |
| 100522267 | 0.272   | 0.114   | -1.3138985  | 1.33E-05         | 1.18E-05         | LOC100522267  |
| 100522389 | 0.642   | 0.316   | -1.1470559  | 3.50E-05         | 3.26E-05         | CCDC153       |
| 100522737 | 0.104   | 0.01    | -3.6577968  | 0.000607619      | 0.000663114      | ANKRD33       |
| 100522753 | 0.498   | 0.19    | -1.3411798  | 1.74E-23         | 5.76E-24         | DNAH14        |
| 100522927 | 8.898   | 4.368   | -1.0408571  | 4.52E-33         | 1.14E-33         | CGREF1        |
| 100523091 | 9.652   | 4.256   | -1.1567132  | 1.03E-103        | 1.01E-104        | CDRT1         |
| 100523107 | 0.616   | 0.266   | -1.3071643  | 2.87E-07         | 2.18E-07         | LOC100523107  |
| 100523209 | 10.194  | 3.31    | -1.5894935  | 0                | 0                | COL7A1        |
| 100523256 | 0.078   | 0.014   | -2.7450832  | 1.51E-07         | 1.11E-07         | LOC100523256  |
| 100523279 | 0.31    | 0.132   | -1.1853227  | 5.44E-06         | 4.65E-06         | CDRT4         |
| 100523323 | 0.16    | 0.058   | -1.2392641  | 0.000257864      | 0.000266697      | NOX4          |
| 100523371 | 319.742 | 127.488 | -1.3452616  | 0                | 0                | APOB          |
| 100523492 | 47.344  | 21.732  | -1.1282986  | 6.49E-279        | 2.59E-280        | LOC100523492  |
| 100523637 | 0.94    | 0.446   | -1.0323192  | 1.75E-07         | 1.30E-07         | KCNAB3        |
| 100523915 | 0.096   | 0.036   | -1.442784   | 0.000374481      | 0.000395608      | SEMA3D        |
| 100524003 | 1.074   | 0.424   | -1.3374379  | 3.51E-07         | 2.68E-07         | TAS2R41       |
| 100524016 | 0.422   | 0.024   | -4.2052846  | 1.82E-09         | 1.16E-09         | LOC100524016  |
| 100524201 | 4.722   | 1.772   | -1.4403478  | 2.95E-67         | 4.19E-68         | FUT2A         |
| 100524266 | 33.904  | 10.7    | -1.6701564  | 0                | 0                | GPAT3         |
| 100524361 | 0.12    | 0.03    | -1.8922621  | 1.21E-07         | 8.91E-08         | QRFP          |
| 100524377 | 8.834   | 3.192   | -1.4891471  | 1.27E-81         | 1.55E-82         | NTN5          |

| Gene ID   | F1 FPKM | F3 FPKM | log2(F3/F1) | Qvalue(F1-vs-F3) | Pvalue(F1-vs-F3) | Other Gene ID |
|-----------|---------|---------|-------------|------------------|------------------|---------------|
| 100524382 | 0.356   | 0.156   | -1.1546759  | 2.16E-05         | 1.97E-05         | LOC100524382  |
| 100524435 | 0.114   | 0.034   | -1.764712   | 0.000740985      | 0.000818859      | SLC16A8       |
| 100524623 | 2.608   | 0.662   | -1.8877517  | 2.18E-26         | 6.65E-27         | TMEM117       |
| 100524697 | 0.678   | 0.338   | -1.0166763  | 3.94E-09         | 2.57E-09         | OMP           |
| 100524750 | 45.54   | 19.034  | -1.2840045  | 1.78E-301        | 6.54E-303        | CYP2J34       |
| 100524811 | 1.2     | 0.494   | -1.2518993  | 2.28E-16         | 9.85E-17         | SCNN1D        |
| 100524821 | 0.146   | 0.036   | -2.04482    | 4.95E-05         | 4.69E-05         | ROBO4         |
| 100525112 | 32.86   | 11.33   | -1.5495238  | 1.87E-298        | 7.05E-300        | LOC100525112  |
| 100525120 | 0.072   | 0.016   | -2.0186573  | 0.000499088      | 0.000537585      | HGF           |
| 100525121 | 0.59    | 0.284   | -1.0574686  | 1.18E-15         | 5.28E-16         | NAV1          |
| 100525134 | 0.182   | 0.074   | -1.442784   | 4.55E-05         | 4.29E-05         | KIAA1456      |
| 100525140 | 2.866   | 1.25    | -1.1775269  | 1.74E-52         | 3.03E-53         | LOC100525140  |
| 100525146 | 5.284   | 2.552   | -1.0346875  | 1.05E-83         | 1.25E-84         | PLXNB3        |
| 100525263 | 27.658  | 11.012  | -1.3361164  | 3.83E-270        | 1.60E-271        | FAXDC2        |
| 100525278 | 0.144   | 0.01    | -3.6577968  | 0.000607619      | 0.000663114      | LOX           |
| 100525324 | 1.536   | 0.492   | -1.5877115  | 4.34E-35         | 1.04E-35         | L1CAM         |
| 100525348 | 0.242   | 0.078   | -1.7767849  | 1.08E-06         | 8.58E-07         | ADGRL4        |
| 100525453 | 1.402   | 0.596   | -1.1714819  | 9.71E-18         | 3.98E-18         | DPYSL3        |
| 100525565 | 0.136   | 0.062   | -1.0924676  | 0.000161859      | 0.000162736      | FSTL4         |
| 100525607 | 0.914   | 0.286   | -1.5938499  | 3.00E-14         | 1.43E-14         | NGFR          |
| 100525613 | 6.344   | 1.694   | -1.8714054  | 7.89E-11         | 4.58E-11         | LOC100525613  |
| 100525676 | 0.254   | 0.098   | -1.3463994  | 0.000120494      | 0.000119437      | PDZD4         |
| 100525762 | 0.494   | 0.166   | -1.5614285  | 5.58E-07         | 4.35E-07         | DDIT4L        |
| 100526058 | 1.162   | 0.454   | -1.3415337  | 3.84E-27         | 1.14E-27         | SLFNL1        |
| 100526221 | 0.18    | 0.078   | -1.1717307  | 0.000372773      | 0.00039375       | SLC17A8       |
| 100526237 | 0.282   | 0.076   | -1.9313619  | 7.80E-07         | 6.14E-07         | FMOD          |
| 100533558 | 2.732   | 0.826   | -1.6566754  | 2.41E-52         | 4.21E-53         | TRPM5         |
| 100579172 | 0.38    | 0.178   | -1.0104685  | 1.43E-07         | 1.06E-07         | APC2          |
| 100620258 | 0.432   | 0.086   | -2.3684851  | 3.11E-11         | 1.76E-11         | THPO          |
| 100620350 | 1.968   | 0.792   | -1.2694468  | 7.42E-25         | 2.36E-25         | CHRD          |
| 100620374 | 6.38    | 1.938   | -1.7301828  | 4.38E-94         | 4.68E-95         | BMP8B         |
| 100620394 | 0.432   | 0.202   | -1.1864911  | 2.74E-08         | 1.91E-08         | COL15A1       |
| 100620540 | 0.588   | 0.244   | -1.2501389  | 1.54E-06         | 1.24E-06         | LOC100620540  |
| 100620587 | 0.296   | 0.116   | -1.5423196  | 0.000318663      | 0.000334195      | IRX2          |

| Gene ID   | F1 FPKM | F3 FPKM | log2(F3/F1) | Qvalue(F1-vs-F3) | Pvalue(F1-vs-F3) | Other Gene ID |
|-----------|---------|---------|-------------|------------------|------------------|---------------|
| 100621059 | 0.276   | 0.078   | -2.0407731  | 8.26E-11         | 4.80E-11         | ADGRF2        |
| 100621352 | 2.168   | 1.082   | -1.0129495  | 3.27E-12         | 1.74E-12         | LOC100621352  |
| 100621607 | 1.45    | 0.402   | -1.7247863  | 9.54E-16         | 4.24E-16         | LOC100621607  |
| 100621671 | 115.454 | 39.018  | -1.5883739  | 0                | 0                | ENPP3         |
| 100621753 | 0.812   | 0.28    | -1.5005439  | 4.40E-09         | 2.87E-09         | PHOSPHO1      |
| 100622304 | 0.578   | 0.164   | -1.7913472  | 1.07E-08         | 7.20E-09         | DCST1         |
| 100622305 | 0.308   | 0.148   | -1.0511488  | 0.000425958      | 0.000453507      | PTGIR         |
| 100622520 | 0.618   | 0.304   | -1.2017554  | 1.11E-05         | 9.76E-06         | GNG8          |
| 100622802 | 0.226   | 0.09    | -1.2979791  | 2.83E-05         | 2.61E-05         | CXHXorf36     |
| 100623173 | 0.086   | 0.03    | -1.5423196  | 0.000193895      | 0.000197138      | ESPNL         |
| 100623257 | 1.174   | 0.558   | -1.0421359  | 1.56E-10         | 9.26E-11         | LOC100623257  |
| 100623339 | 0.308   | 0.032   | -3.1272821  | 5.00E-06         | 4.25E-06         | QPRT          |
| 100623602 | 0.064   | 0.01    | -2.4979255  | 4.65E-10         | 2.85E-10         | HMCN2         |
| 100624186 | 4.768   | 1.682   | -1.4239249  | 5.66E-40         | 1.22E-40         | GPRC5A        |
| 100624435 | 4.782   | 1.152   | -2.0722797  | 5.40E-74         | 7.18E-75         | LOC100624435  |
| 100624460 | 0.048   | 0.006   | -2.9177326  | 1.88E-10         | 1.12E-10         | LOC100624460  |
| 100624918 | 1.246   | 0.33    | -1.8631474  | 1.07E-09         | 6.67E-10         | LOC100624918  |
| 100624981 | 0.572   | 0.142   | -1.6109598  | 1.01E-07         | 7.33E-08         | 12-Sep        |
| 100625267 | 0.222   | 0.074   | -1.572067   | 4.81E-05         | 4.55E-05         | SYT12         |
| 100625364 | 0.254   | 0.128   | -1.2203915  | 0.000784639      | 0.000869488      | ERG           |
| 100625920 | 25.212  | 8.896   | -1.4527592  | 1.52E-149        | 1.05E-150        | ADA           |
| 100625942 | 58.27   | 29.018  | -1.0062372  | 1.61E-305        | 5.85E-307        | BST1          |
| 100626199 | 0.876   | 0.324   | -1.6447291  | 1.52E-11         | 8.42E-12         | LOC100626199  |
| 100626716 | 1.68    | 0.714   | -1.3207051  | 2.17E-31         | 5.75E-32         | COL1A2        |
| 100626898 | 0.228   | 0.102   | -1.1336818  | 3.31E-08         | 2.32E-08         | LANCL3        |
| 100627072 | 3.258   | 1.372   | -1.2890398  | 1.62E-102        | 1.61E-103        | PTPRD         |
| 100627510 | 0.06    | 0.01    | -2.6203221  | 0.000393543      | 0.000417057      | CDH6          |
| 100627513 | 119.598 | 54.876  | -1.1116178  | 0                | 0                | STOM          |
| 100627924 | 0.538   | 0.278   | -1.0114891  | 7.03E-10         | 4.34E-10         | MYH11         |
| 100627929 | 11.012  | 4.838   | -1.2883037  | 4.66E-41         | 9.89E-42         | FLYWCH2       |
| 100627950 | 0.28    | 0.108   | -1.2749585  | 1.22E-05         | 1.09E-05         | ADAMTS13      |
| 100627962 | 1.322   | 0.64    | -1.0323557  | 1.11E-06         | 8.83E-07         | C4H1orf162    |
| 100628050 | 0.272   | 0.056   | -2.3947624  | 8.88E-10         | 5.53E-10         | MYBPC3        |
| 100628053 | 0.652   | 0.328   | -1.0302331  | 2.35E-06         | 1.93E-06         | FBXL2         |



| Gene ID   | F1 FPKM | F3 FPKM | log2(F3/F1) | Qvalue(F1-vs-F3) | Pvalue(F1-vs-F3) | Other Gene ID |
|-----------|---------|---------|-------------|------------------|------------------|---------------|
| 100628113 | 6.106   | 2.97    | -1.0252387  | 1.61E-122        | 1.37E-123        | PHLPP2        |
| 100628129 | 0.344   | 0.058   | -2.6852776  | 3.59E-09         | 2.33E-09         | EMCN          |
| 100736591 | 0.31    | 0.144   | -1.1280834  | 0.00081633       | 0.00090638       | LYPD3         |
| 100736592 | 1.336   | 0.608   | -1.1797495  | 9.53E-09         | 6.39E-09         | FBXO44        |
| 100737235 | 0.894   | 0.442   | -1.0255286  | 8.15E-09         | 5.44E-09         | LRRC27        |
| 100737468 | 16.628  | 7.584   | -1.1390626  | 2.47E-81         | 3.05E-82         | IL34          |
| 100737517 | 156.626 | 71.798  | -1.143821   | 0                | 0                | SLC40A1       |
| 100737524 | 0.276   | 0.126   | -1.1310721  | 1.14E-05         | 1.01E-05         | PSD2          |
| 100737755 | 6.808   | 1.386   | -2.2618456  | 3.40E-142        | 2.47E-143        | LOC100737755  |
| 100737768 | 23.022  | 9.73    | -1.2945925  | 3.22E-44         | 6.39E-45         | LOC100737768  |
| 100737904 | 0.812   | 0.326   | -1.2276893  | 0.000293772      | 0.000306387      | LOC100737904  |
| 100738062 | 2.846   | 0.73    | -2.0043206  | 4.30E-88         | 4.85E-89         | ACOT12        |
| 100738075 | 0.808   | 0.402   | -1.0170269  | 0.00014757       | 0.000147686      | LOC100738075  |
| 100738360 | 1.94    | 0.93    | -1.0740807  | 2.60E-09         | 1.67E-09         | PDIA2         |
| 100739083 | 0.284   | 0.116   | -1.2513729  | 2.54E-07         | 1.91E-07         | FAM205A       |
| 100739158 | 0.358   | 0.122   | -1.5289732  | 8.65E-15         | 4.02E-15         | SUCNR1        |
| 100739471 | 0.152   | 0.048   | -1.5896253  | 0.000961985      | 0.001077719      | RFTN2         |
| 100739528 | 0.144   | 0.01    | -3.7986594  | 5.69E-10         | 3.50E-10         | LOC100739528  |
| 100739561 | 19.032  | 8.898   | -1.1217288  | 2.91E-123        | 2.46E-124        | LOC100739561  |
| 100739839 | 0.632   | 0.172   | -1.8247194  | 1.12E-13         | 5.52E-14         | SPATC1        |
| 102160115 | 59.062  | 23.358  | -1.3545422  | 0                | 0                | MGAM          |
| 102161210 | 4.418   | 2.07    | -1.0634521  | 2.38E-18         | 9.55E-19         | LOC102161210  |
| 102162017 | 0.408   | 0.182   | -1.0799764  | 5.30E-07         | 4.12E-07         | EFCAB8        |
| 102162205 | 0.314   | 0.098   | -1.608004   | 1.29E-17         | 5.34E-18         | LOC102162205  |
| 102162296 | 0.668   | 0.162   | -2.0029645  | 3.09E-09         | 2.00E-09         | LOC102162296  |
| 102162410 | 0.156   | 0.074   | -1.1222985  | 0.000724662      | 0.000799561      | GPR17         |
| 102162779 | 0.796   | 0.37    | -1.0713209  | 0.000134609      | 0.000134052      | C13H3orf35    |
| 102163220 | 0.39    | 0.19    | -1.0553721  | 9.61E-09         | 6.45E-09         | ASPRV1        |
| 102163819 | 114.19  | 53.91   | -1.0719584  | 0                | 0                | MS4A10        |
| 102164386 | 1.128   | 0.54    | -1.0653994  | 4.19E-08         | 2.95E-08         | HCAR2         |
| 102165015 | 8.356   | 2.424   | -1.8733159  | 6.68E-105        | 6.50E-106        | LOC102165015  |
| 102165270 | 0.434   | 0.192   | -1.1676013  | 6.30E-07         | 4.92E-07         | ZNF750        |
| 102165510 | 0.648   | 0.2     | -1.635429   | 2.00E-06         | 1.63E-06         | LOC102165510  |
| 102166010 | 0.442   | 0.216   | -1.0718098  | 1.21E-07         | 8.89E-08         | IQCH          |

| Gene ID   | F1 FPKM | F3 FPKM | log2(F3/F1) | Qvalue(F1-vs-F3) | Pvalue(F1-vs-F3) | Other Gene ID |
|-----------|---------|---------|-------------|------------------|------------------|---------------|
| 102166052 | 0.194   | 0.054   | -1.7913327  | 2.89E-05         | 2.67E-05         | DPCR1         |
| 102166693 | 0.038   | 0.014   | -1.6492348  | 9.50E-05         | 9.32E-05         | HMCN1         |
| 102166764 | 0.322   | 0.11    | -1.6761754  | 8.17E-08         | 5.91E-08         | COLEC12       |
| 102167522 | 7.062   | 3.158   | -1.0116667  | 6.71E-06         | 5.80E-06         | LOC102167522  |
| 102167930 | 0.094   | 0.014   | -3.0172629  | 0.000908472      | 0.001014609      | LOC102167930  |
| 102168098 | 1.77    | 0.64    | -1.3999667  | 1.85E-26         | 5.61E-27         | LOC102168098  |
| 106504234 | 44.512  | 18.732  | -1.2710059  | 0                | 0                | LOC106504234  |
| 106504796 | 0.61    | 0.216   | -1.5329055  | 5.54E-37         | 1.28E-37         | LOC106504796  |
| 106505070 | 5.9     | 1.98    | -1.5192171  | 5.90E-80         | 7.42E-81         | RGS13         |
| 106505208 | 1.852   | 0.574   | -1.7268166  | 1.21E-16         | 5.18E-17         | LOC106505208  |
| 106506828 | 1.058   | 0.312   | -1.7449488  | 8.52E-14         | 4.17E-14         | LOC106506828  |
| 106507601 | 0.234   | 0.05    | -2.2742269  | 0.000781526      | 0.000865699      | LOC106507601  |
| 106508195 | 0.492   | 0.15    | -1.6353251  | 6.31E-08         | 4.51E-08         | TAS2R40       |
| 106508237 | 1.416   | 0.55    | -1.352503   | 7.88E-06         | 6.85E-06         | LOC106508237  |
| 106508546 | 0.32    | 0.118   | -1.5313632  | 2.49E-09         | 1.60E-09         | LOC106508546  |
| 106509227 | 0.404   | 0.134   | -1.6954764  | 7.40E-05         | 7.16E-05         | LOC106509227  |
| 106509580 | 1.062   | 0.458   | -1.2470067  | 7.88E-08         | 5.70E-08         | LOC106509580  |
| 106509652 | 3.304   | 1.338   | -1.2883683  | 1.91E-14         | 9.06E-15         | LOC106509652  |
| 106510141 | 1.026   | 0.47    | -1.0808546  | 6.01E-05         | 5.77E-05         | LOC106510141  |
| 106510284 | 44.022  | 20.158  | -1.0791233  | 1.03E-239        | 4.74E-241        | LOC106510284  |
| 110255181 | 0.47    | 0.124   | -1.9304001  | 1.09E-06         | 8.70E-07         | LOC110255181  |
| 110255271 | 0.568   | 0.152   | -1.7228919  | 1.02E-05         | 8.94E-06         | LOC110255271  |
| 110255553 | 2.548   | 1.112   | -1.184258   | 3.88E-12         | 2.08E-12         | LOC110255553  |
| 110255930 | 0.44    | 0.11    | -2.084469   | 2.02E-10         | 1.21E-10         | NOTUM         |
| 110255970 | 2.142   | 0.764   | -1.4712521  | 2.01E-17         | 8.36E-18         | LOC110255970  |
| 110256043 | 2.098   | 0.804   | -1.5198669  | 4.74E-16         | 2.08E-16         | LOC110256043  |
| 110256114 | 0.884   | 0.394   | -1.1797495  | 4.29E-06         | 3.63E-06         | PMP22         |
| 110256120 | 0.248   | 0.068   | -1.9114872  | 0.000459389      | 0.000491496      | MFAP4         |
| 110256150 | 1.86    | 0.622   | -1.570713   | 2.10E-47         | 3.94E-48         | KCNJ12        |
| 110256417 | 1.066   | 0.456   | -1.2910145  | 6.38E-15         | 2.95E-15         | FSTL1         |
| 110256522 | 0.284   | 0.104   | -1.4891353  | 0.000511705      | 0.000552065      | STKLD1        |
| 110256864 | 0.212   | 0.03    | -2.764712   | 0.000135118      | 0.000134618      | LOC110256864  |
| 110257013 | 0.33    | 0       | -5.2742269  | 5.12E-06         | 4.37E-06         | LOC110257013  |
| 110257397 | 7.638   | 3.606   | -1.0626211  | 2.45E-78         | 3.13E-79         | PTK6          |

| Gene ID   | F1 FPKM | F3 FPKM | log2(F3/F1) | Qvalue(F1-vs-F3) | Pvalue(F1-vs-F3) | Other Gene ID |
|-----------|---------|---------|-------------|------------------|------------------|---------------|
| 110257399 | 1.456   | 0.53    | -1.453783   | 8.81E-12         | 4.81E-12         | SRMS          |
| 110257482 | 0.184   | 0.078   | -1.2067166  | 1.22E-07         | 8.95E-08         | LAMA5         |
| 110257613 | 0.27    | 0.092   | -1.507906   | 0.000285349      | 0.000296942      | LOC110257613  |
| 110258586 | 2.356   | 0.614   | -1.9616428  | 1.24E-21         | 4.35E-22         | LOC110258586  |
| 110258588 | 0.844   | 0.234   | -1.7268071  | 1.87E-08         | 1.28E-08         | LOC110258588  |
| 110258627 | 0.252   | 0.066   | -1.9657206  | 0.00073687       | 0.000813671      | LOC110258627  |
| 110258836 | 0.114   | 0.02    | -2.38304    | 0.000844565      | 0.000939932      | LOC110258836  |
| 110258908 | 0.116   | 0.03    | -1.7881144  | 9.29E-05         | 9.10E-05         | LOC110258908  |
| 110258978 | 0.418   | 0.114   | -1.8483285  | 4.84E-05         | 4.58E-05         | LOC110258978  |
| 110259135 | 7.618   | 3.828   | -1.0347659  | 5.19E-28         | 1.51E-28         | LOC110259135  |
| 110259856 | 2.014   | 0.326   | -2.642071   | 2.74E-49         | 5.01E-50         | LOC110259856  |
| 110259937 | 0.84    | 0.344   | -1.1958493  | 0.000840858      | 0.000935563      | LOC110259937  |
| 110260296 | 0.698   | 0.314   | -1.0668825  | 0.000665916      | 0.000731173      | ALKAL1        |
| 110260309 | 1.232   | 0.54    | -1.2648107  | 8.96E-07         | 7.09E-07         | LOC110260309  |
| 110260351 | 1.814   | 0.894   | -1.0110508  | 0.000485112      | 0.000521336      | LOC110260351  |
| 110260907 | 1.702   | 0.608   | -1.4862216  | 2.07E-62         | 3.11E-63         | LOC110260907  |
| 110261137 | 0.998   | 0.342   | -1.4997783  | 1.48E-09         | 9.35E-10         | GJB3          |
| 110261159 | 0.858   | 0.398   | -1.0588862  | 8.55E-11         | 4.97E-11         | PRELID3A      |
| 110261274 | 0.104   | 0       | -4.8642477  | 8.18E-05         | 7.96E-05         | WTIP          |
| 110261361 | 0.21    | 0.022   | -3.1272821  | 4.45E-09         | 2.91E-09         | LOC110261361  |
| 110261410 | 0.99    | 0.432   | -1.2329916  | 3.99E-06         | 3.37E-06         | LOC110261410  |
| 110261553 | 4.7     | 0.782   | -2.5827566  | 1.27E-30         | 3.44E-31         | LOC110261553  |
| 110262053 | 9.862   | 3.124   | -1.6115224  | 8.52E-122        | 7.30E-123        | LOC110262053  |
| 110262192 | 1.64    | 0       | -6.5365976  | 2.64E-12         | 1.40E-12         | LOC110262192  |
| 110262277 | 0.196   | 0.04    | -2.3509415  | 5.12E-05         | 4.87E-05         | UBTFL1        |
| 396579    | 0.214   | 0       | -4.5423196  | 0.000460596      | 0.000492921      | TNNT1         |
| 396643    | 0.112   | 0.076   | -1.5250416  | 0.000180086      | 0.000182106      | SSTR3         |
| 396711    | 5.26    | 1.876   | -1.4804576  | 9.13E-136        | 7.00E-137        | LOC396711     |
| 396725    | 0.372   | 0.15    | -1.4850948  | 5.96E-05         | 5.71E-05         | DES           |
| 396729    | 0.348   | 0.124   | -1.5285138  | 8.83E-09         | 5.91E-09         | TEK           |
| 396735    | 183.656 | 71.62   | -1.4120486  | 0                | 0                | CXCL16        |
| 396811    | 1.44    | 0.714   | -1.0531132  | 5.08E-13         | 2.59E-13         | PTGER3        |
| 396845    | 2.502   | 1.112   | -1.2217288  | 3.96E-20         | 1.47E-20         | TF            |
| 396847    | 0.162   | 0.056   | -1.4820327  | 0.000607328      | 0.000662532      | MAN2B2        |

| Gene ID | F1 FPKM | F3 FPKM | log2(F3/F1) | Qvalue(F1-vs-F3) | Pvalue(F1-vs-F3) | Other Gene ID |
|---------|---------|---------|-------------|------------------|------------------|---------------|
| 396848  | 3.078   | 1.978   | -1.1059283  | 3.00E-47         | 5.67E-48         | MYLK          |
| 396856  | 0.046   | 0.02    | -1.2792852  | 0.000743923      | 0.000822214      | RYR2          |
| 396859  | 15.642  | 2.908   | -2.4412473  | 0                | 0                | NOS2          |
| 396888  | 0.164   | 0.066   | -1.2843384  | 3.41E-09         | 2.21E-09         | RYR3          |
| 396896  | 1.138   | 0.274   | -2.0094456  | 5.67E-16         | 2.49E-16         | CHAT          |
| 396940  | 0.086   | 0.004   | -4.2016059  | 0.000652668      | 0.000715871      | AMELX         |
| 396954  | 0.72    | 0.336   | -1.06925    | 0.000381098      | 0.000402985      | PROC          |
| 396957  | 3.144   | 0.752   | -2.2114951  | 2.68E-35         | 6.42E-36         | DCN           |
| 396963  | 0.778   | 0.292   | -1.4204442  | 6.10E-09         | 4.03E-09         | ITIH1         |
| 396971  | 0.51    | 0.156   | -1.6896704  | 7.46E-10         | 4.61E-10         | ALOX15        |
| 397048  | 0.388   | 0.062   | -2.6577968  | 6.08E-09         | 4.02E-09         | SRD5A2        |
| 397073  | 88.674  | 41.252  | -1.1072257  | 0                | 0                | ABCG2         |
| 397095  | 33.154  | 15.492  | -1.0839241  | 2.05E-174        | 1.23E-175        | GGT1          |
| 397113  | 405.52  | 184.368 | -1.1489381  | 0                | 0                | SLC5A1        |
| 397124  | 2.284   | 1.152   | -1.0574346  | 1.70E-07         | 1.26E-07         | RBP4          |
| 397152  | 9.288   | 3.976   | -1.2325183  | 1.48E-115        | 1.32E-116        | TMPRSS15      |
| 397160  | 0.278   | 0.144   | -1.0948607  | 0.000966882      | 0.001083484      | CD34          |
| 397172  | 0.232   | 0.14    | -1.1429818  | 3.86E-05         | 3.61E-05         | CALCRL        |
| 397192  | 0.83    | 0.164   | -2.3358688  | 3.77E-11         | 2.14E-11         | VTN           |
| 397200  | 29.232  | 13.906  | -1.0775687  | 1.78E-216        | 9.08E-218        | SLC28A1       |
| 397206  | 3.214   | 0.992   | -1.7027843  | 7.82E-11         | 4.53E-11         | MGP           |
| 397216  | 0.102   | 0.022   | -2.1797495  | 0.000120832      | 0.000119807      | OPRD1         |
| 397246  | 23.054  | 9.73    | -1.2484921  | 5.15E-124        | 4.31E-125        | VNN1          |
| 397309  | 11.696  | 5.25    | -1.2677895  | 2.17E-113        | 1.98E-114        | HTR1D         |
| 397311  | 0.394   | 0.202   | -1.0680012  | 1.82E-07         | 1.35E-07         | KDR           |
| 397322  | 1.23    | 0.594   | -1.0162508  | 4.92E-07         | 3.81E-07         | IGFALS        |
| 397346  | 5.17    | 1.624   | -1.6625859  | 7.62E-73         | 1.02E-73         | MMP13         |
| 397358  | 50.694  | 25.194  | -1.0147776  | 0                | 0                | SLC9A3        |
| 397376  | 31.406  | 13.522  | -1.2325247  | 9.38E-203        | 5.17E-204        | SLC5A4        |
| 397381  | 702.696 | 334.056 | -1.0676292  | 0                | 0                | MTTP          |
| 397419  | 4.09    | 1.802   | -1.1165557  | 2.89E-07         | 2.19E-07         | TTR           |
| 397460  | 0.252   | 0.116   | -1.2088959  | 2.24E-06         | 1.84E-06         | TNC           |
| 397474  | 6.578   | 1.588   | -2.0090192  | 1.64E-83         | 1.96E-84         | F12           |
| 397526  | 0.77    | 0.296   | -1.519236   | 4.13E-10         | 2.52E-10         | C7            |

| Gene ID | F1 FPKM | F3 FPKM | log2(F3/F1) | Qvalue(F1-vs-F3) | Pvalue(F1-vs-F3) | Other Gene ID |
|---------|---------|---------|-------------|------------------|------------------|---------------|
| 397535  | 32.514  | 14.888  | -1.1300278  | 0                | 0                | ABCC2         |
| 397541  | 3.218   | 0.694   | -2.1301937  | 1.54E-56         | 2.51E-57         | PTGS1         |
| 397583  | 12.594  | 5.254   | -1.2524776  | 1.09E-123        | 9.13E-125        | LIPE          |
| 397621  | 0.544   | 0.278   | -1.0513668  | 2.34E-05         | 2.13E-05         | SLC17A1       |
| 397624  | 79.636  | 24.82   | -1.6911512  | 0                | 0                | SLC15A1       |
| 397626  | 0.616   | 0.274   | -1.3979297  | 2.60E-07         | 1.96E-07         | LYVE1         |
| 397628  | 8.976   | 4.064   | -1.124747   | 4.34E-45         | 8.50E-46         | ANGPTL4       |
| 397681  | 2517.77 | 828.416 | -1.6137408  | 0                | 0                | APOA4         |
| 397691  | 6715.18 | 2696.27 | -1.3195893  | 0                | 0                | APOA1         |
| 399528  | 4.606   | 1.15    | -2.0044057  | 2.48E-78         | 3.18E-79         | CPT1B         |
| 399543  | 0.418   | 0.216   | -1.0910356  | 6.86E-11         | 3.96E-11         | VWF           |
| 403104  | 14.086  | 5.938   | -1.2777319  | 5.94E-128        | 4.84E-129        | CYP2B22       |
| 403106  | 17.064  | 6.09    | -1.5091093  | 7.42E-144        | 5.31E-145        | CYP2C32       |
| 403108  | 129.006 | 44.644  | -1.5327563  | 0                | 0                | CYP2C34       |
| 403110  | 12.82   | 4.784   | -1.4334977  | 5.60E-97         | 5.83E-98         | CYP2C36       |
| 403215  | 35.194  | 15.24   | -1.2223922  | 2.42E-215        | 1.24E-216        | CYP2C49       |
| 403324  | 256.198 | 69.496  | -1.8768519  | 0                | 0                | CYP3A29       |
| 404690  | 0.566   | 0.266   | -1.082352   | 0.000944749      | 0.001057588      | ST6GALNAC5    |
| 404693  | 0.746   | 0.302   | -1.4014571  | 1.07E-08         | 7.24E-09         | CAV1          |
| 404698  | 91.34   | 44.964  | -1.012634   | 0                | 0                | HYAL1         |
| 406187  | 3342.59 | 1243.49 | -1.4515452  | 0                | 0                | APOC3         |
| 407066  | 51.798  | 22.798  | -1.2602043  | 1.29E-75         | 1.69E-76         | HBB           |
| 414411  | 106.336 | 36.64   | -1.5546645  | 0                | 0                | ASS1          |
| 414737  | 0.394   | 0.11    | -1.9723075  | 3.32E-11         | 1.88E-11         | CDH5          |
| 414836  | 0.246   | 0.088   | -1.5324718  | 8.98E-12         | 4.91E-12         | FBN1          |
| 414914  | 17.676  | 6.376   | -1.4696529  | 0                | 0                | COL17A1       |
| 445003  | 4.302   | 1.618   | -1.40011    | 3.39E-89         | 3.78E-90         | MRC1          |
| 445453  | 0.586   | 0       | -4.764712   | 0.000145416      | 0.000145404      | CCL27         |
| 445536  | 2.164   | 1.134   | -1.0400148  | 0.000272704      | 0.000282993      | LOC445536     |
| 492312  | 0.362   | 0.128   | -1.635429   | 0.000637087      | 0.000697857      | MADCAM1       |
| 494019  | 71.496  | 31.832  | -1.1609148  | 2.42E-251        | 1.07E-252        | CXCL10        |
| 494460  | 0.386   | 0.106   | -2.0353596  | 1.97E-05         | 1.78E-05         | CXCL12        |
| 494464  | 1.16    | 0.196   | -2.6943227  | 0.000231101      | 0.000237343      | CCL19         |
| 497235  | 1.76    | 0.572   | -1.6205855  | 3.01E-18         | 1.21E-18         | SLC5A10       |

| Gene ID | F1 FPKM | F3 FPKM | log2(F3/F1) | Qvalue(F1-vs-F3) | Pvalue(F1-vs-F3) | Other Gene ID |
|---------|---------|---------|-------------|------------------|------------------|---------------|
| 595124  | 5.596   | 2.676   | -1.1580882  | 8.18E-31         | 2.20E-31         | SPARC         |
| 613133  | 206.692 | 98.302  | -1.1767031  | 0                | 0                | ACE           |
| 733615  | 2.434   | 1.2     | -1.1131979  | 1.68E-09         | 1.06E-09         | ACTA2         |
| 733628  | 0.212   | 0.074   | -1.5423196  | 2.65E-05         | 2.43E-05         | AEBP1         |
| 733634  | 3.418   | 1.542   | -1.1450629  | 9.25E-15         | 4.30E-15         | AKR1C1        |
| 733662  | 4.478   | 0.918   | -2.2351819  | 1.26E-54         | 2.11E-55         | F10           |
| 733694  | 1.974   | 0.968   | -1.0058678  | 4.97E-14         | 2.40E-14         | AKR1C1        |
