# Supplementary material for: Transcriptome Profile Analysis of Intestinal Upper Villus Epithelial Cells and Crypt Epithelial Cells of Suckling Piglets
Source: MDPI journal article supplement (doi:10.3390/ani12182324), 2022-09-07
Supplement: s1 [file s1]

Table S4. Primers used for qRT-PCR analysis

| Gene    | Prime   | Sequence                           |
|---------|---------|------------------------------------|
| HOXA5   | Forward | 5'- GTT CCG TGA GCG AGC AAT TC -3' |
|         | Reverse | 5'- ACG CTG AGA TCC ATG CCA TT -3' |
| ZFP36   | Forward | 5'- CAT GGA TCT CAC CGC CAT CT -3' |
|         | Reverse | 5'- GCG CTA GAG GGT GAG ACT TG -3' |
| KLF2    | Forward | 5'- GAC CAC GAT CCT CCT TGA CG -3' |
|         | Reverse | 5'- GCA TCA AGC CTC GAT CCT CT -3' |
| HSP70-2 | Forward | 5'- CTT CAA CAT GAA GAG CGC CG -3' |
|         | Reverse | 5'- TGA TGG GGT TAC ACA CCT GC -3' |
| MUC13   | Forward | 5'- GCT ACA GTG GAG TTG GCT GT -3' |
|         | Reverse | 5'- GAC GAA TGC AAT CAC CAG GC-3'  |
| WNT10B  | Forward | 5'- TGA GTG AGG AGC CCG AAG TT-3'  |
|         | Reverse | 5'- CAA GGA GGG CTC CGG AAT AG-3'  |
| AQP10   | Forward | 5'- GAC ACA CGG AAC AAG GGA GT-3'  |
|         | Reverse | 5'- CCC ACC ACC AAC CAT TAC CA-3'  |
| SLC15A1 | Forward | 5'- CAG ACT TCG ACC ACA ACG GA-3'  |
|         | Reverse | 5'- TTA TCC CGC CAG TAC CCA GA-3'  |
| GAPDH   | Forward | 5'- ATG GTG AAG GTC GGA GTG AA-3'  |
|         | Reverse | 5'- CGT GGG TGG AAT CAT ACT GG-3'  |
