# Supplementary material for: Transcriptome Profile Analysis of Intestinal Upper Villus Epithelial Cells and Crypt Epithelial Cells of Suckling Piglets
Source: MDPI journal article supplement (doi:10.3390/ani12182324), 2022-09-07
Supplement: s1 [file s1]

Table S1. The up-regulation DEGs of the crypt cells (F3) compared with the villus upper cells (F1)

| Gene ID   | F1 FPKM | F3 FPKM | log2(F3/F1) | Qvalue(F1-vs-F3) | Pvalue(F1-vs-F3) | Other Gene ID |
|-----------|---------|---------|-------------|------------------|------------------|---------------|
| 100037933 | 0.038   | 1.188   | 4.686499063 | 1.46E-18         | 5.75E-19         | IL17F         |
| 100037941 | 2.256   | 9.822   | 2.008349991 | 4.79E-210        | 2.52E-211        | PDE4B         |
| 100037943 | 221.46  | 484.198 | 1.06604968  | 0                | 0                | RETNLB        |
| 100038004 | 2.02    | 7.866   | 1.70141258  | 2.84E-111        | 2.66E-112        | EGR2          |
| 100048932 | 44.844  | 168.352 | 1.878623303 | 0                | 0                | BTG2          |
| 100126238 | 8.964   | 17.646  | 1.002182234 | 2.14E-117        | 1.90E-118        | BCAS1         |
| 100144467 | 2.476   | 5.31    | 1.083158033 | 2.91E-15         | 1.33E-15         | ASCL2         |
| 100144477 | 0.04    | 0.174   | 2.200671794 | 5.67E-05         | 5.41E-05         | CD163L1       |
| 100144486 | 147.534 | 504.432 | 1.769091117 | 0                | 0                | FOS           |
| 100144503 | 42.984  | 134.418 | 1.773992339 | 0                | 0                | RHOB          |
| 100144619 | 59.396  | 127.194 | 1.083239249 | 0                | 0                | ITLN2         |
| 100151888 | 1.35    | 2.964   | 1.15831308  | 1.76E-60         | 2.72E-61         | ZBTB10        |
| 100151939 | 0.038   | 0.37    | 2.301413452 | 5.10E-05         | 4.84E-05         | LYPD1         |
| 100151994 | 1.772   | 3.422   | 1.03050231  | 2.91E-29         | 8.17E-30         | LGR5          |
| 100152141 | 0.898   | 3.024   | 1.76685656  | 2.68E-38         | 6.01E-39         | CTGF          |
| 100152200 | 14.77   | 34.962  | 1.173634072 | 0                | 0                | C7H6orf222    |
| 100152253 | 2.27    | 5.164   | 1.175398082 | 9.82E-37         | 2.28E-37         | STX11         |
| 100152349 | 0.502   | 1.212   | 1.193202549 | 1.80E-12         | 9.40E-13         | AMIGO2        |
| 100152492 | 0.034   | 0.106   | 1.627605374 | 0.000810702      | 0.000899544      | A2ML1         |
| 100152504 | 0.222   | 0.97    | 2.057142443 | 0.000166599      | 0.000167671      | IFN-ALPHA-15  |
| 100152997 | 4.224   | 13.904  | 1.722983422 | 2.73E-78         | 3.50E-79         | GADD45G       |
| 100153074 | 0.544   | 1.516   | 1.423464657 | 1.31E-09         | 8.22E-10         | NCR2          |
| 100153176 | 4.178   | 8.562   | 1.05780268  | 6.45E-25         | 2.05E-25         | SFRP5         |
| 100153265 | 2.362   | 6.062   | 1.338098756 | 3.66E-51         | 6.52E-52         | SH2D2A        |
| 100153272 | 0.19    | 0.534   | 1.468907628 | 0.000221151      | 0.000226515      | RIPPLY3       |
| 100153365 | 3.624   | 12.218  | 1.763982232 | 5.43E-127        | 4.43E-128        | CD83          |
| 100153791 | 0.528   | 1.294   | 1.242315218 | 3.11E-09         | 2.01E-09         | CYR61         |
| 100154053 | 4.868   | 11.584  | 1.24979105  | 3.00E-147        | 2.11E-148        | LOC100154053  |
| 100154253 | 0.11    | 0.274   | 1.524511881 | 2.61E-07         | 1.97E-07         | BICC1         |
| 100154395 | 0.388   | 0.89    | 1.201072235 | 9.95E-08         | 7.25E-08         | NOV           |
| 100155114 | 2.278   | 4.896   | 1.137990749 | 4.12E-33         | 1.04E-33         | TAGAP         |
| 100155581 | 3.976   | 8.5     | 1.102943383 | 6.78E-24         | 2.21E-24         | LTB           |
| 100155738 | 0.018   | 0.088   | 2.212567874 | 0.000110659      | 0.000109239      | LOC100155738  |

| Gene ID   | F1 FPKM | F3 FPKM | log2(F3/F1) | Qvalue(F1-vs-F3) | Pvalue(F1-vs-F3) | Other Gene ID |
|-----------|---------|---------|-------------|------------------|------------------|---------------|
| 100155836 | 1.11    | 2.32    | 1.087036992 | 2.24E-18         | 8.94E-19         | SERPINB5      |
| 100156484 | 11.706  | 32.556  | 1.45599154  | 3.15E-291        | 1.22E-292        | MAFF          |
| 100156553 | 0.144   | 0.392   | 1.427306723 | 1.29E-07         | 9.51E-08         | LOC100156553  |
| 100156741 | 0.854   | 2.48    | 1.563043917 | 1.35E-05         | 1.20E-05         | LOC100156741  |
| 100156849 | 0.116   | 0.318   | 1.562017032 | 0.000115316      | 0.000114121      | DISC1         |
| 100157298 | 7.77    | 17.986  | 1.208437864 | 2.88E-122        | 2.46E-123        | SAMSN1        |
| 100157564 | 0.266   | 0.504   | 1.004168725 | 0.000322239      | 0.000338085      | CEBPE         |
| 100157952 | 0.532   | 1.436   | 1.471486172 | 7.60E-16         | 3.36E-16         | HEY1          |
| 100174954 | 3.982   | 8.174   | 1.028143303 | 6.24E-75         | 8.19E-76         | KLF11         |
| 100174959 | 1.004   | 3.776   | 1.899608243 | 2.05E-36         | 4.80E-37         | KLF2          |
| 100174961 | 24.552  | 51.112  | 1.05019874  | 0                | 0                | KLF6          |
| 100240743 | 16.932  | 58.072  | 1.676171909 | 2.31E-217        | 1.17E-218        | DDIT3         |
| 100271930 | 3.936   | 13.764  | 1.715961248 | 1.98E-131        | 1.57E-132        | IL7R          |
| 100286800 | 298.612 | 801.834 | 1.41639137  | 0                | 0                | BPI           |
| 100286870 | 0.162   | 0.732   | 2.113032201 | 1.37E-08         | 9.33E-09         | TNFAIP6       |
| 100312980 | 0.562   | 1.134   | 1.089948588 | 0.000423534      | 0.000450681      | RNASE1        |
| 100316849 | 91.576  | 258.2   | 1.480747581 | 0                | 0                | ZFP36         |
| 100337659 | 1.128   | 2.776   | 1.299585531 | 1.17E-42         | 2.40E-43         | EPHB3         |
| 100462720 | 0.026   | 0.106   | 2.244276734 | 0.000301905      | 0.000315362      | ATG9B         |
| 100499568 | 0.084   | 0.352   | 1.968642291 | 2.24E-05         | 2.04E-05         | HOXA5         |
| 100510896 | 5.932   | 12.588  | 1.07470907  | 3.24E-64         | 4.76E-65         | UBALD1        |
| 100511294 | 0.064   | 0.164   | 1.448635232 | 5.34E-05         | 5.09E-05         | PTPRZ1        |
| 100511325 | 0.704   | 1.966   | 1.401096844 | 3.44E-14         | 1.65E-14         | SLAMF1        |
| 100511493 | 0.016   | 0.114   | 2.626001488 | 0.000454873      | 0.000486203      | GDF1          |
| 100511902 | 5.148   | 11.842  | 1.191397174 | 5.72E-87         | 6.52E-88         | RCAN1         |
| 100512029 | 2.248   | 4.73    | 1.072544359 | 4.55E-34         | 1.12E-34         | SYP           |
| 100512063 | 0.584   | 1.268   | 1.106554637 | 7.03E-05         | 6.78E-05         | POU2AF1       |
| 100512231 | 0.226   | 0.588   | 1.502074491 | 0.000915011      | 0.001022177      | MFAP5         |
| 100512416 | 4.914   | 10.636  | 1.120896699 | 6.46E-56         | 1.06E-56         | FOXA3         |
| 100512496 | 0.616   | 2.31    | 1.912582332 | 1.62E-22         | 5.52E-23         | RASD1         |
| 100512960 | 24.666  | 55.268  | 1.186845541 | 0                | 0                | TRIB1         |
| 100514273 | 6.698   | 15.904  | 1.246423982 | 1.29E-76         | 1.67E-77         | GIF           |
| 100514348 | 6.762   | 14.524  | 1.112223065 | 4.56E-86         | 5.23E-87         | REP15         |
| 100514823 | 0.316   | 0.654   | 1.052228922 | 1.40E-07         | 1.03E-07         | NLRP3         |

| Gene ID   | F1 FPKM  | F3 FPKM | log2(F3/F1) | Qvalue(F1-vs-F3) | Pvalue(F1-vs-F3) | Other Gene ID |
|-----------|----------|---------|-------------|------------------|------------------|---------------|
| 100515419 | 1.07     | 3.5     | 1.673617771 | 6.96E-20         | 2.60E-20         | CD28          |
| 100515679 | 0.144    | 0.372   | 1.318974101 | 4.03E-05         | 3.78E-05         | CXCR5         |
| 100516016 | 0.13     | 0.772   | 2.5280697   | 2.22E-05         | 2.02E-05         | CCL22         |
| 100516472 | 0.004    | 0.052   | 3.743082591 | 0.000461857      | 0.000494405      | KIAA1755      |
| 100516931 | 0.1      | 0.536   | 2.364570968 | 2.65E-07         | 2.00E-07         | ARL4D         |
| 100517416 | 2.328    | 4.742   | 1.014445981 | 2.90E-36         | 6.80E-37         | DUSP10        |
| 100517477 | 0.414    | 0.892   | 1.072390216 | 1.50E-05         | 1.34E-05         | LOC100517477  |
| 100517790 | 0.17     | 0.402   | 1.273968419 | 0.000205659      | 0.000209723      | CCNO          |
| 100517891 | 1282.366 | 3208.95 | 1.312727649 | 0                | 0                | LOC100517891  |
| 100518506 | 3.442    | 7.02    | 1.002179497 | 9.63E-41         | 2.05E-41         | FAM177B       |
| 100518720 | 0.19     | 0.366   | 1.002750146 | 1.85E-05         | 1.67E-05         | CHSY3         |
| 100519286 | 0.05     | 0.406   | 2.779608467 | 1.12E-07         | 8.21E-08         | SERPINB2      |
| 100519542 | 0.102    | 0.248   | 1.219520635 | 0.000413721      | 0.00043934       | COL26A1       |
| 100519728 | 0.27     | 0.544   | 1.014179409 | 2.34E-06         | 1.92E-06         | KL            |
| 100520167 | 0.108    | 0.226   | 1.111684517 | 3.38E-06         | 2.82E-06         | PAX5          |
| 100520241 | 0.094    | 0.362   | 1.890639779 | 5.67E-05         | 5.42E-05         | LOC100520241  |
| 100520336 | 0.334    | 0.956   | 1.499991177 | 1.18E-13         | 5.81E-14         | NMUR1         |
| 100520600 | 2.754    | 5.768   | 1.019315603 | 3.72E-41         | 7.87E-42         | TP53I11       |
| 100520726 | 47.034   | 199.478 | 2.073630317 | 0                | 0                | EGR1          |
| 100520768 | 0.136    | 0.842   | 2.581801684 | 8.29E-15         | 3.85E-15         | CCDC173       |
| 100520915 | 1.036    | 3.566   | 1.632924071 | 2.55E-88         | 2.87E-89         | COL11A2       |
| 100520981 | 22.736   | 55.004  | 1.094294501 | 0                | 0                | NFKBIZ        |
| 100521143 | 3.274    | 6.98    | 1.09781958  | 9.28E-48         | 1.73E-48         | EPDR1         |
| 100521185 | 8.974    | 21.394  | 1.253044741 | 1.10E-108        | 1.04E-109        | ZFAND2A       |
| 100521388 | 6.414    | 16.07   | 1.356552409 | 4.11E-146        | 2.90E-147        | CRTAM         |
| 100521665 | 1.176    | 2.758   | 1.140019374 | 4.50E-09         | 2.94E-09         | TPPP3         |
| 100521670 | 0.294    | 0.994   | 1.775358994 | 1.33E-11         | 7.33E-12         | RASL11B       |
| 100521797 | 0.012    | 0.054   | 2.290570386 | 0.000824574      | 0.000916488      | GRIN2D        |
| 100522293 | 56.424   | 116.666 | 1.029090523 | 0                | 0                | CFP           |
| 100522469 | 83.006   | 209.796 | 1.293184118 | 0                | 0                | DUSP1         |
| 100522635 | 3.152    | 15.894  | 2.164478885 | 2.24E-249        | 1.01E-250        | GPR183        |
| 100522679 | 28.622   | 94.698  | 1.711274889 | 0                | 0                | PPP1R15A      |
| 100522787 | 0.1      | 0.222   | 1.143221645 | 0.000427416      | 0.000455183      | LOC100522787  |
| 100523046 | 0.486    | 1.688   | 1.732727788 | 9.30E-17         | 3.96E-17         | C2H19orf24    |

| Gene ID   | F1 FPKM | F3 FPKM | log2(F3/F1) | Qvalue(F1-vs-F3) | Pvalue(F1-vs-F3) | Other Gene ID |
|-----------|---------|---------|-------------|------------------|------------------|---------------|
| 100523358 | 24.584  | 53.208  | 1.10406166  | 0                | 0                | JUNB          |
| 100524123 | 0.918   | 2.252   | 1.288553101 | 1.85E-16         | 7.96E-17         | CXCR3         |
| 100524265 | 4.616   | 11.796  | 1.331563862 | 7.66E-50         | 1.38E-50         | CXCL13        |
| 100524409 | 0.476   | 1.054   | 1.143571782 | 3.50E-15         | 1.60E-15         | RBBP8NL       |
| 100524628 | 0.408   | 1.814   | 2.177802456 | 6.58E-16         | 2.90E-16         | TNFRSF4       |
| 100524723 | 0.306   | 0.87    | 1.463485994 | 4.20E-07         | 3.24E-07         | CHAC1         |
| 100525205 | 0.272   | 1.672   | 2.618992243 | 8.15E-26         | 2.53E-26         | FOSL1         |
| 100525396 | 3.118   | 9.266   | 1.532160058 | 9.25E-49         | 1.70E-49         | LOC100525396  |
| 100525703 | 9.114   | 21.118  | 1.023168095 | 3.15E-149        | 2.19E-150        | DNAJB4        |
| 100621090 | 6.416   | 14.398  | 1.177467296 | 5.50E-80         | 6.91E-81         | GADD45B       |
| 100621284 | 0.056   | 0.164   | 1.534495969 | 5.06E-08         | 3.59E-08         | UNC5C         |
| 100621378 | 0.066   | 1.714   | 5.192154445 | 1.01E-80         | 1.26E-81         | TREX2         |
| 100621540 | 0       | 0.992   | 7.189746017 | 1.95E-17         | 8.10E-18         | LDHB          |
| 100621791 | 7.676   | 16.556  | 1.087107164 | 2.08E-56         | 3.40E-57         | C14H10orf10   |
| 100621861 | 0.864   | 1.752   | 1.02753598  | 7.26E-09         | 4.82E-09         | MNS1          |
| 100622156 | 12.736  | 37.384  | 1.474397895 | 0                | 0                | TNFAIP3       |
| 100623310 | 0.156   | 0.532   | 1.815232377 | 3.01E-05         | 2.78E-05         | RRAD          |
| 100623410 | 0.162   | 0.466   | 1.475566127 | 5.95E-07         | 4.64E-07         | CCR4          |
| 100623564 | 0.08    | 0.224   | 1.55165652  | 0.000349888      | 0.00036836       | TLE6          |
| 100623585 | 0.13    | 0.378   | 1.509768883 | 1.70E-11         | 9.45E-12         | CR1           |
| 100624047 | 0.022   | 0.06    | 1.409425203 | 0.000136071      | 0.000135607      | LRP1B         |
| 100624251 | 0.27    | 0.724   | 1.457887403 | 0.000138487      | 0.000138155      | LOC100624251  |
| 100625944 | 2.65    | 7.746   | 1.48133164  | 3.73E-24         | 1.20E-24         | RGCC          |
| 100626468 | 8.208   | 16.26   | 1.012923385 | 9.29E-163        | 5.92E-164        | SLC2A3        |
| 100626906 | 1.66    | 3.4     | 1.020838502 | 3.06E-24         | 9.86E-25         | SIX5          |
| 100626975 | 0.3     | 0.864   | 1.485877264 | 3.11E-12         | 1.65E-12         | BHLHA15       |
| 100627130 | 0.032   | 0.254   | 3.099996866 | 0.000109701      | 0.000108182      | CAMK2N2       |
| 100627312 | 0.176   | 0.44    | 1.271461563 | 1.44E-05         | 1.29E-05         | NUMBL         |
| 100627600 | 0.71    | 1.548   | 1.145479909 | 1.61E-30         | 4.37E-31         | GALNT5        |
| 100627879 | 0.488   | 1.414   | 1.442250332 | 1.05E-09         | 6.55E-10         | LOC100627879  |
| 100627952 | 0.366   | 0.944   | 1.272940492 | 3.66E-08         | 2.57E-08         | MS4A1         |
| 100628052 | 7.404   | 15.462  | 1.065760112 | 9.17E-59         | 1.44E-59         | C17H8orf4     |
| 100736733 | 354.29  | 802.028 | 1.16325016  | 0                | 0                | LOC100736733  |
| 100737113 | 0.334   | 1.034   | 1.502229695 | 4.98E-08         | 3.53E-08         | LOC100737113  |

| Gene ID   | F1 FPKM | F3 FPKM | log2(F3/F1) | Qvalue(F1-vs-F3) | Pvalue(F1-vs-F3) | Other Gene ID |
|-----------|---------|---------|-------------|------------------|------------------|---------------|
| 100737739 | 1.962   | 4.65    | 1.24522204  | 9.10E-26         | 2.82E-26         | RND1          |
| 100738064 | 0.16    | 0.68    | 2.194645966 | 3.34E-06         | 2.79E-06         | PLA2G2A       |
| 100738575 | 0.148   | 0.58    | 1.888580896 | 0.000136387      | 0.000135941      | LOC100738575  |
| 100738612 | 39.488  | 147.994 | 1.87545044  | 0                | 0                | ATF3          |
| 100738739 | 0.716   | 1.466   | 1.091418281 | 2.68E-12         | 1.42E-12         | C2CD4B        |
| 100739001 | 0.058   | 0.286   | 2.290570386 | 0.000824574      | 0.000916488      | NXNL2         |
| 100739218 | 335.552 | 724.694 | 1.098005126 | 0                | 0                | LOC100739218  |
| 100739379 | 0.364   | 0.876   | 1.27044879  | 2.48E-06         | 2.05E-06         | ASGR2         |
| 102161937 | 0.752   | 2.072   | 1.494769691 | 2.83E-15         | 1.29E-15         | IER5L         |
| 102162743 | 2.986   | 6.446   | 1.102829879 | 3.81E-42         | 7.89E-43         | FAM174B       |
| 102166057 | 0.09    | 0.272   | 1.471486172 | 0.000780908      | 0.000864901      | RGS9          |
| 106504170 | 3.258   | 6.73    | 1.025125112 | 5.76E-46         | 1.11E-46         | OTUD1         |
| 106504776 | 0.236   | 0.532   | 1.126707138 | 0.000778935      | 0.000862377      | LOC106504776  |
| 106505000 | 1.298   | 2.922   | 1.143728998 | 5.86E-20         | 2.18E-20         | LOC106505000  |
| 106505696 | 0.226   | 0.52    | 1.232974085 | 9.23E-11         | 5.37E-11         | DZIP1L        |
| 110255204 | 0.62    | 1.776   | 1.678325131 | 2.84E-24         | 9.14E-25         | LOC110255204  |
| 110255508 | 1.554   | 3.202   | 1.025298575 | 3.47E-24         | 1.12E-24         | CER1          |
| 110255652 | 0.362   | 0.772   | 1.198350361 | 8.30E-06         | 7.23E-06         | LOC110255652  |
| 110256018 | 0.308   | 0.62    | 1.003472276 | 1.54E-05         | 1.38E-05         | EPOP          |
| 110256612 | 0.77    | 1.696   | 1.145212606 | 6.11E-11         | 3.52E-11         | NEUROG3       |
| 110257437 | 1.88    | 3.768   | 1.005822599 | 4.09E-29         | 1.15E-29         | TGIF2         |
| 110257549 | 0.536   | 1.102   | 1.063704488 | 3.75E-07         | 2.87E-07         | C18H7orf57    |
| 110257782 | 0.744   | 1.662   | 1.255738659 | 5.99E-06         | 5.14E-06         | LOC110257782  |
| 110258079 | 1.482   | 3.776   | 1.364570968 | 1.57E-26         | 4.74E-27         | LRRC26        |
| 110258320 | 0.232   | 0.44    | 1.03892937  | 7.76E-05         | 7.53E-05         | LOC110258320  |
| 110258711 | 0.13    | 0.592   | 2.181230597 | 1.58E-05         | 1.41E-05         | LOC110258711  |
| 110258721 | 0.304   | 0.632   | 1.082076099 | 0.000613222      | 0.00066994       | LOC110258721  |
| 110258824 | 0.112   | 0.716   | 2.618028415 | 4.70E-06         | 4.00E-06         | LOC110258824  |
| 110259314 | 84.444  | 198.982 | 1.214188852 | 0                | 0                | JUND          |
| 110260310 | 26.318  | 66.974  | 1.349087549 | 3.66E-289        | 1.44E-290        | LOC110260310  |
| 110260624 | 0.11    | 0.548   | 2.312732036 | 7.92E-12         | 4.31E-12         | TNFRSF13C     |
| 110260748 | 0.348   | 0.966   | 1.53683991  | 5.15E-06         | 4.39E-06         | CLEC4E        |
| 110260749 | 0.048   | 0.366   | 3.037233436 | 5.66E-06         | 4.84E-06         | LOC110260749  |
| 110260774 | 0.772   | 2.058   | 1.39161022  | 3.27E-25         | 1.03E-25         | ENDOU         |

| Gene ID   | F1 FPKM | F3 FPKM | log2(F3/F1) | Qvalue(F1-vs-F3) | Pvalue(F1-vs-F3) | Other Gene ID |
|-----------|---------|---------|-------------|------------------|------------------|---------------|
| 110260904 | 3.948   | 8.102   | 1.042002671 | 1.95E-91         | 2.13E-92         | OSGIN1        |
| 110261005 | 0.23    | 0.466   | 1.042642873 | 4.01E-05         | 3.76E-05         | NKPD1         |
| 110261009 | 23.232  | 126.616 | 2.421742888 | 0                | 0                | FOSB          |
| 110261354 | 1.484   | 3.872   | 1.393678345 | 1.04E-06         | 8.32E-07         | LOC110261354  |
| 110261743 | 0.15    | 0.642   | 2.037172002 | 1.54E-12         | 8.04E-13         | LOC110261743  |
| 396562    | 0.092   | 0.26    | 1.502074491 | 0.000148927      | 0.000149173      | GFAP          |
| 396583    | 0.248   | 0.688   | 1.417038388 | 5.45E-06         | 4.66E-06         | SNAI1         |
| 396648    | 458.098 | 988.094 | 1.105099952 | 0                | 0                | HSP70.2       |
| 396659    | 19.424  | 69.596  | 1.809579655 | 0                | 0                | CXCR4         |
| 396663    | 0.102   | 1.404   | 3.776831382 | 1.36E-36         | 3.18E-37         | CCR7          |
| 396668    | 23.806  | 48.24   | 1.028737271 | 1.03E-33         | 2.56E-34         | CCL4          |
| 396741    | 199.842 | 535.994 | 1.408520608 | 0                | 0                | DNAJB1        |
| 396769    | 1.376   | 2.856   | 1.067998447 | 2.26E-13         | 1.13E-13         | MMP3          |
| 396862    | 9.926   | 22.318  | 1.112721309 | 1.19E-42         | 2.45E-43         | TIMP1         |
| 396880    | 62.394  | 148.716 | 1.204941375 | 0                | 0                | CXCL8         |
| 396913    | 206.76  | 532.814 | 1.362100131 | 0                | 0                | JUN           |
| 396915    | 2.15    | 6.078   | 1.449723648 | 6.58E-46         | 1.27E-46         | EDN1          |
| 396948    | 5.834   | 11.892  | 1.024794871 | 7.17E-39         | 1.59E-39         | HSD11B2       |
| 397106    | 0.892   | 3.522   | 1.979541124 | 1.02E-31         | 2.66E-32         | IL10          |
| 397122    | 2.506   | 6.264   | 1.342289936 | 3.99E-41         | 8.46E-42         | IL1B          |
| 397165    | 15.376  | 41      | 1.411580228 | 4.54E-106        | 4.38E-107        | CD69          |
| 397195    | 17.758  | 38.002  | 1.081117021 | 2.27E-143        | 1.63E-144        | ADM           |
| 397208    | 0.298   | 0.896   | 1.659314233 | 3.30E-05         | 3.07E-05         | CSF2          |
| 397210    | 0.168   | 0.35    | 1.115399215 | 0.000370976      | 0.000391637      | TRPC3         |
| 397231    | 1.634   | 3.286   | 1.005168167 | 3.57E-07         | 2.73E-07         | CD40LG        |
| 397251    | 4.216   | 17.226  | 2.058305274 | 0                | 0                | PLK2          |
| 397278    | 22.302  | 48.61   | 1.12898787  | 6.39E-141        | 4.67E-142        | PMAIP1        |
| 397286    | 1.328   | 4.662   | 1.799371722 | 2.22E-19         | 8.47E-20         | CTLA4         |
| 397316    | 21.714  | 48.608  | 1.154198052 | 4.63E-151        | 3.19E-152        | FCN1          |
| 397382    | 1.004   | 2.412   | 1.263721962 | 2.48E-21         | 8.78E-22         | MUC1          |
| 397400    | 0.118   | 0.374   | 1.606543758 | 9.26E-07         | 7.34E-07         | TGFB3         |
| 397407    | 1.47    | 3.086   | 1.058584417 | 3.56E-05         | 3.31E-05         | CLPS          |
| 397423    | 0.842   | 7.336   | 3.258580272 | 8.26E-42         | 1.73E-42         | FABP6         |
| 397479    | 0.936   | 3.768   | 2.031036253 | 7.39E-135        | 5.68E-136        | NR4A3         |

| Gene ID | F1 FPKM | F3 FPKM | log2(F3/F1) | Qvalue(F1-vs-F3) | Pvalue(F1-vs-F3) | Other Gene ID |
|---------|---------|---------|-------------|------------------|------------------|---------------|
| 397544  | 0.572   | 2.842   | 2.345419867 | 3.03E-59         | 4.74E-60         | RGS16         |
| 397564  | 5.554   | 12.534  | 1.169128072 | 2.56E-95         | 2.71E-96         | HBEGF         |
| 397590  | 0.302   | 0.684   | 1.187188579 | 1.17E-08         | 7.90E-09         | PTGS2         |
| 397612  | 0.14    | 0.526   | 1.890639779 | 5.67E-05         | 5.42E-05         | LY49          |
| 397613  | 0.196   | 0.562   | 1.612632867 | 7.12E-10         | 4.39E-10         | DNAJA4        |
| 397669  | 0.176   | 0.542   | 1.606543758 | 9.26E-07         | 7.34E-07         | CD19          |
| 403123  | 0.152   | 1.474   | 3.400194877 | 3.78E-09         | 2.46E-09         | IL21          |
| 404704  | 1.11    | 2.23    | 1.024495526 | 8.96E-17         | 3.80E-17         | CD4           |
| 414904  | 0.64    | 4.086   | 2.662443166 | 1.47E-37         | 3.36E-38         | CXCL2         |
| 444998  | 0.24    | 0.496   | 1.457910905 | 1.64E-08         | 1.12E-08         | FOXP3         |
| 445518  | 12.548  | 26.18   | 1.056491738 | 1.81E-52         | 3.14E-53         | SPAL-2        |
| 448981  | 35.966  | 75.832  | 1.072141733 | 0                | 0                | C2            |
| 449530  | 0.054   | 0.422   | 2.797530375 | 1.12E-05         | 9.85E-06         | IL17A         |
| 492313  | 2.536   | 8.266   | 1.669053236 | 2.09E-208        | 1.12E-209        | THBS1         |
| 574055  | 0.098   | 0.532   | 2.502074491 | 0.000171076      | 0.000172475      | TNFSF8        |
| 595104  | 1.606   | 7.548   | 2.146665937 | 1.39E-54         | 2.34E-55         | IL22          |
| 595111  | 38.188  | 85.662  | 1.161308857 | 0                | 0                | KLF4          |
| 733597  | 2.412   | 7.196   | 1.49556706  | 3.29E-79         | 4.18E-80         | ICOS          |
| 733613  | 0.63    | 1.602   | 1.31101542  | 2.26E-16         | 9.78E-17         | IL23R         |
| 780438  | 1.03    | 2.132   | 1.042642873 | 9.11E-06         | 7.97E-06         | SMPX          |
| 780439  | 26.792  | 85.516  | 1.667526407 | 0                | 0                | SOD3          |
